# Supplementary material
Source: publisher figshare collection journal article supplement (https://gsajournals.figshare.com/ndownloader/files/16874846)
Supplement: Supplementary file 1 [file 16874846]

## Sheet: Table 1 rmtA Full analysis
AFLAID	DEL.fc	DEL.adjpval	OE.fc	OE.adjpval
AFLA_000010	2.22e-15	1	2.22e-15	1
AFLA_000020	2.22e-15	1	2.22e-15	1
AFLA_000330	1.90857	0.514381	0.300989	1
AFLA_000340	0.265589	1	0.5425	1
AFLA_000350	0.263881	1	2.22e-15	1
AFLA_000360	0.558798	1	2.22e-15	1
AFLA_000370	1.15738	1	1.16122	1
AFLA_000380	2.22e-15	1	0.282524	1
AFLA_000390	2.22e-15	1	2.22e-15	1
AFLA_000500	2.22e-15	1	2.22e-15	1
AFLA_000510	0.456662	1	1.51707	1
AFLA_000520	2.22e-15	1	2.22e-15	1
AFLA_000530	2.22e-15	1	2.22e-15	1
AFLA_000540	2.22e-15	1	2.22e-15	1
AFLA_000550	-2.08639	0.668674	-1.70733	0.918495
AFLA_000560	0.263881	1	2.22e-15	1
AFLA_000570	2.22e-15	1	2.22e-15	1
AFLA_000580	2.22e-15	1	2.22e-15	1
AFLA_000590	2.22e-15	1	2.22e-15	1
AFLA_000600	2.22e-15	1	2.22e-15	1
AFLA_000610	2.22e-15	1	2.22e-15	1
AFLA_000620	-1.463	0.649532	-0.950273	1
AFLA_000630	2.22e-15	1	2.22e-15	1
AFLA_000640	2.44094	0.353067	0.426891	1
AFLA_000650	2.22e-15	1	2.22e-15	1
AFLA_000660	2.22e-15	1	0.282524	1
AFLA_000680	-0.66503	1	0.256756	1
AFLA_000690	2.22e-15	1	2.22e-15	1
AFLA_000700	0.654009	1	-0.200018	1
AFLA_000710	1.42878	0.741273	0.120971	1
AFLA_000720	0.263881	1	0.485013	1
AFLA_000730	-0.410494	1	-0.529104	1
AFLA_000740	0.576234	1	0.705453	1
AFLA_000750	2.22e-15	1	0.512724	1
AFLA_000760	-0.66503	1	0.79871	1
AFLA_000770	-0.174039	1	0.323248	1
AFLA_000780	-0.185482	1	-1.34703	1
AFLA_000790	-0.284317	1	-0.283484	1
AFLA_000800	0.258246	1	0.338935	1
AFLA_000810	2.22e-15	1	0.676206	1
AFLA_000820	2.22e-15	1	2.22e-15	1
AFLA_000830	2.22e-15	1	2.22e-15	1
AFLA_000840	1.06631	0.711733	2.22e-15	1
AFLA_000850	0.456662	1	2.22e-15	1
AFLA_000860	2.47829	0.74881	0.809397	1
AFLA_000870	2.22e-15	1	2.22e-15	1
AFLA_000880	2.22e-15	1	2.22e-15	1
AFLA_000890	2.22e-15	1	2.22e-15	1
AFLA_000900	2.22e-15	1	2.22e-15	1
AFLA_000910	0.456662	1	0.583513	1
AFLA_000920	-0.8257	1	-0.177878	1
AFLA_000930	2.66e-15	1	2.22e-15	1
AFLA_000940	0.175909	1	-0.66503	1
AFLA_000950	2.22e-15	1	0.300989	1
AFLA_000960	0.608637	1	2.22e-15	1
AFLA_000970	2.22e-15	1	2.22e-15	1
AFLA_000980	2.22e-15	1	2.22e-15	1
AFLA_000990	2.22e-15	1	2.22e-15	1
AFLA_001000	0.730967	1	2.22e-15	1
AFLA_001010	0.608637	1	0.512724	1
AFLA_001020	0.263881	1	1.15567	0.76477
AFLA_001030	2.22e-15	1	2.22e-15	1
AFLA_001040	0.456662	1	2.22e-15	1
AFLA_001050	-0.630067	1	-1.67892	1
AFLA_001060	2.22e-15	1	2.22e-15	1
AFLA_001070	2.22e-15	1	2.22e-15	1
AFLA_001080	0.674575	1	-0.66503	1
AFLA_001090	2.22e-15	1	2.22e-15	1
AFLA_001100	1.43835	1	2.22e-15	1
AFLA_001110	-1.18382	1	-1.43829	1
AFLA_001120	2.22e-15	1	2.22e-15	1
AFLA_001130	2.22e-15	1	2.22e-15	1
AFLA_001140	2.22e-15	1	2.22e-15	1
AFLA_001150	2.22e-15	1	2.22e-15	1
AFLA_001160	2.22e-15	1	2.22e-15	1
AFLA_001170	2.22e-15	1	2.22e-15	1
AFLA_001180	2.22e-15	1	2.22e-15	1
AFLA_001190	0.17953	1	-0.160759	1
AFLA_001200	2.22e-15	1	2.22e-15	1
AFLA_001210	-0.735933	1	-0.657212	1
AFLA_001220	2.22e-15	1	0.676206	1
AFLA_001230	0.489572	1	-0.831777	1
AFLA_001240	1.52172	1	-0.309097	1
AFLA_001250	2.22e-15	1	2.22e-15	1
AFLA_001260	2.22e-15	1	2.22e-15	1
AFLA_001270	0.332207	1	2.22e-15	1
AFLA_001280	2.22e-15	1	0.997736	1
AFLA_001290	2.22e-15	1	2.22e-15	1
AFLA_001300	2.22e-15	1	2.22e-15	1
AFLA_001310	2.22e-15	1	2.22e-15	1
AFLA_001320	2.22e-15	1	2.22e-15	1
AFLA_001330	0.840939	1	2.00088	1
AFLA_001340	0.263881	1	2.22e-15	1
AFLA_001350	-0.160233	1	-0.375879	1
AFLA_001360	0.986277	1	2.22e-15	1
AFLA_001370	-1.21902	0.961982	-0.37573	1
AFLA_001380	2.22e-15	1	2.22e-15	1
AFLA_001390	0.940845	1	0.772428	1
AFLA_001400	2.22e-15	1	2.22e-15	1
AFLA_001410	1.35037	1	0.9774	1
AFLA_001420	0.332207	1	2.22e-15	1
AFLA_001430	2.22e-15	1	2.22e-15	1
AFLA_001440	-0.646869	1	-0.624412	1
AFLA_001450	-0.265627	1	-0.434507	1
AFLA_001460	0.263881	1	2.22e-15	1
AFLA_001470	2.22e-15	1	2.22e-15	1
AFLA_001480	0.456662	1	2.22e-15	1
AFLA_001490	2.22e-15	1	2.22e-15	1
AFLA_001500	2.22e-15	1	2.22e-15	1
AFLA_001510	2.22e-15	1	2.22e-15	1
AFLA_001520	-0.818559	1	-0.910649	1
AFLA_001530	-3.29043	0.573426	-2.80541	0.780436
AFLA_001540	2.22e-15	1	2.22e-15	1
AFLA_001550	2.22e-15	1	0.512724	1
AFLA_001560	-0.969065	1	-0.336059	1
AFLA_001570	0.456662	1	2.22e-15	1
AFLA_001580	-2.89562	6.51e-06	-2.89562	6.51e-06
AFLA_001590	0.332207	1	2.22e-15	1
AFLA_001600	2.22e-15	1	2.22e-15	1
AFLA_001610	0.401696	1	0.00792061	1
AFLA_001620	0.367802	1	-0.645737	1
AFLA_001630	0.456662	1	0.300989	1
AFLA_001640	-1.3833	1	-1.64123	1
AFLA_001650	0.608637	1	0.795248	1
AFLA_001660	-1.07998	0.224905	-0.326878	1
AFLA_001670	2.22e-15	1	0.512724	1
AFLA_001680	-1.67838	0.603334	-0.366664	1
AFLA_001690	2.22e-15	1	2.22e-15	1
AFLA_001700	2.22e-15	1	0.300989	1
AFLA_001710	2.22e-15	1	0.88217	1
AFLA_001720	2.22e-15	1	2.22e-15	1
AFLA_001730	0.734099	1	0.485013	1
AFLA_001740	-0.66503	1	-0.0220885	1
AFLA_001750	-1.463	0.283038	-1.463	0.308769
AFLA_001760	0.456662	1	2.22e-15	1
AFLA_001770	0.263881	1	2.22e-15	1
AFLA_001780	2.22e-15	1	2.22e-15	1
AFLA_001790	2.22e-15	1	2.22e-15	1
AFLA_001800	2.48648	0.871665	0.9774	1
AFLA_001810	-0.0363487	1	-0.489774	1
AFLA_001820	-1.11849	2.19e-05	-1.11849	2.19e-05
AFLA_001830	0.502405	1	0.120971	1
AFLA_001840	2.22e-15	1	2.22e-15	1
AFLA_001850	2.22e-15	1	0.809397	1
AFLA_001860	2.22e-15	1	2.66e-15	1
AFLA_001870	2.22e-15	1	2.22e-15	1
AFLA_001880	2.22e-15	1	2.22e-15	1
AFLA_001890	2.22e-15	1	2.22e-15	1
AFLA_001900	0.332207	1	1.57424	0.923987
AFLA_001910	2.22e-15	1	0.282524	1
AFLA_001920	0.430485	1	-0.0349741	1
AFLA_001930	1.10747	0.595853	1.16802	0.628984
AFLA_001940	0.456662	1	0.676206	1
AFLA_001950	0.263881	1	1.45234	0.36842
AFLA_001960	-1.22096	1	0.338507	1
AFLA_001970	2.22e-15	1	0.512724	1
AFLA_001980	2.22e-15	1	2.22e-15	1
AFLA_001990	-0.66503	1	0.011176	1
AFLA_002000	0.989949	1	-0.159764	1
AFLA_002010	1.26623	1	-1.29806	1
AFLA_002020	2.22e-15	1	2.22e-15	1
AFLA_002030	2.22e-15	1	2.22e-15	1
AFLA_002040	2.22e-15	1	2.22e-15	1
AFLA_002050	2.22e-15	1	0.282524	1
AFLA_002060	2.22e-15	1	0.642941	1
AFLA_002070	2.22e-15	1	2.22e-15	1
AFLA_002080	2.22e-15	1	2.22e-15	1
AFLA_002090	2.22e-15	1	2.22e-15	1
AFLA_002100	0.730967	1	0.786001	1
AFLA_002110	2.22e-15	1	0.282524	1
AFLA_002120	2.22e-15	1	2.22e-15	1
AFLA_002130	0.456662	1	0.676206	1
AFLA_002140	2.22e-15	1	2.22e-15	1
AFLA_002150	1.25287	1	0.512724	1
AFLA_002160	2.22e-15	1	2.22e-15	1
AFLA_002170	0.263881	1	2.22e-15	1
AFLA_002180	2.22e-15	1	2.22e-15	1
AFLA_002190	0.0690693	1	0.144367	1
AFLA_002200	-0.332823	1	1.1264	0.83901
AFLA_002210	1.54264	1	0.011176	1
AFLA_002220	2.22e-15	1	0.282524	1
AFLA_002230	2.22e-15	1	2.22e-15	1
AFLA_002240	-0.401149	1	-0.66503	0.83901
AFLA_002250	2.22e-15	1	2.22e-15	1
AFLA_002260	2.22e-15	1	2.22e-15	1
AFLA_002270	-1.47701	1	1.27189	1
AFLA_002280	0.181863	1	0.0656644	1
AFLA_002290	2.22e-15	1	2.22e-15	1
AFLA_002300	2.22e-15	1	2.22e-15	1
AFLA_002310	-0.661832	1	0.0183382	1
AFLA_002320	0.524785	1	0.806275	1
AFLA_002330	-0.316272	1	0.910769	1
AFLA_002340	2.22e-15	1	0.300989	1
AFLA_002350	-0.522406	1	-0.60577	1
AFLA_002360	-0.66503	1	1.13893	1
AFLA_002370	-0.926671	1	-1.40186	1
AFLA_002380	-1.74089	0.196949	-1.74089	0.212029
AFLA_002390	2.22e-15	1	2.22e-15	1
AFLA_002400	0.553704	1	2.16833	1
AFLA_002410	1.72817	1	1.559	1
AFLA_002420	-1.19912	1	-0.653599	1
AFLA_002430	-0.157442	1	0.344028	1
AFLA_002440	2.22e-15	1	2.22e-15	1
AFLA_002450	0.162911	1	1.05391	1
AFLA_002460	2.22e-15	1	2.22e-15	1
AFLA_002470	2.22e-15	1	2.22e-15	1
AFLA_002480	-0.589204	1	0.0698455	1
AFLA_002490	0.608637	1	0.512724	1
AFLA_002500	-0.114321	1	-0.654124	1
AFLA_002510	0.582152	1	0.354636	1
AFLA_002520	-1.16657	1	-1.12539	1
AFLA_002530	-1.57819	0.800407	-1.49807	0.943904
AFLA_002540	0.436452	1	0.601295	1
AFLA_002550	0.263881	1	2.22e-15	1
AFLA_002560	2.22e-15	1	2.22e-15	1
AFLA_002570	2.66e-15	1	1.18122	1
AFLA_002580	-0.454548	1	0.290128	1
AFLA_002590	-1.91458	1	0.574169	1
AFLA_002600	-1.78252	1	0.519957	1
AFLA_002610	-0.854613	0.721521	0.0427243	1
AFLA_002620	-2.51957	1	-1.07511	1
AFLA_002630	1.01637	1	1.37162	1
AFLA_002640	0.288797	1	-0.779387	1
AFLA_002650	2.22e-15	1	2.22e-15	1
AFLA_002660	0.986277	1	0.300989	1
AFLA_002670	2.22e-15	1	2.66e-15	1
AFLA_002680	2.22e-15	1	0.300989	1
AFLA_002690	1.17315	0.803844	2.22e-15	1
AFLA_002700	1.3396	0.418707	0.300989	1
AFLA_002710	-0.908808	1	-0.815072	1
AFLA_002720	-1.72286	0.797677	-0.41058	1
AFLA_002730	1.16744	1	0.485013	1
AFLA_002740	2.22e-15	1	2.22e-15	1
AFLA_002750	2.22e-15	1	2.22e-15	1
AFLA_002760	-1.9738	1	-0.500233	1
AFLA_002770	0.0574914	1	-0.377868	1
AFLA_002780	0.330885	1	0.183712	1
AFLA_002790	-0.886145	0.879742	-0.859926	1
AFLA_002800	1.88565	0.595595	1.71214	0.76263
AFLA_002810	0.0690693	1	-0.364041	1
AFLA_002820	2.22e-15	1	2.22e-15	1
AFLA_002830	-0.66503	0.828358	-0.364041	1
AFLA_002840	0.608637	1	2.22e-15	1
AFLA_002850	0.00207005	1	-0.950273	1
AFLA_002860	0.864144	1	0.850847	1
AFLA_002870	0.576635	1	0.439882	1
AFLA_002880	2.22e-15	1	2.22e-15	1
AFLA_002890	-0.332823	1	-0.66503	1
AFLA_002900	0.263881	1	2.22e-15	1
AFLA_002910	-1.36516	1	-0.399561	1
AFLA_002920	0.456662	1	2.22e-15	1
AFLA_002930	2.22e-15	1	2.22e-15	1
AFLA_002940	2.22e-15	1	2.22e-15	1
AFLA_002950	-1.15112	0.939751	-0.521459	1
AFLA_002960	2.22e-15	1	2.22e-15	1
AFLA_002970	2.22e-15	1	0.300989	1
AFLA_002980	0.801355	1	0.266142	1
AFLA_002990	2.22e-15	1	2.22e-15	1
AFLA_003000	2.22e-15	1	2.22e-15	1
AFLA_003010	2.22e-15	1	2.22e-15	1
AFLA_003020	2.22e-15	1	2.22e-15	1
AFLA_003030	2.22e-15	1	2.22e-15	1
AFLA_003040	2.22e-15	1	0.300989	1
AFLA_003050	2.22e-15	1	2.22e-15	1
AFLA_003060	2.22e-15	1	2.22e-15	1
AFLA_003070	2.22e-15	1	2.22e-15	1
AFLA_003080	0.263881	1	2.22e-15	1
AFLA_003090	2.22e-15	1	2.22e-15	1
AFLA_003100	-1.88514	0.79379	-1.01992	1
AFLA_003110	2.22e-15	1	2.22e-15	1
AFLA_003120	0.299261	1	1.04227	1
AFLA_003130	0.332207	1	2.22e-15	1
AFLA_003140	2.22e-15	1	2.22e-15	1
AFLA_003150	2.22e-15	1	2.22e-15	1
AFLA_003160	2.22e-15	1	0.300989	1
AFLA_003170	2.22e-15	1	1.25042	1
AFLA_003180	2.22e-15	1	2.22e-15	1
AFLA_003190	2.22e-15	1	2.22e-15	1
AFLA_003200	2.22e-15	1	0.282524	1
AFLA_003210	2.22e-15	1	2.22e-15	1
AFLA_003220	-0.786287	0.977368	-1.11849	0.808208
AFLA_003230	2.22e-15	1	2.22e-15	1
AFLA_003240	-0.650673	1	-0.297118	1
AFLA_003250	2.22e-15	1	2.22e-15	1
AFLA_003260	0.78887	1	2.23666	1
AFLA_003270	-2.35027	1	-0.585511	1
AFLA_003280	2.22e-15	1	0.512724	1
AFLA_003290	2.22e-15	1	2.22e-15	1
AFLA_003300	2.22e-15	1	0.300989	1
AFLA_003310	2.22e-15	1	2.22e-15	1
AFLA_003320	2.22e-15	1	2.22e-15	1
AFLA_003330	0.608637	1	2.22e-15	1
AFLA_003340	2.22e-15	1	2.22e-15	1
AFLA_003350	-2.24323	0.554833	-0.932876	1
AFLA_003360	2.22e-15	1	2.22e-15	1
AFLA_003370	2.22e-15	1	2.22e-15	1
AFLA_003380	2.22e-15	1	2.22e-15	1
AFLA_003390	-1.11849	0.734314	0.827735	1
AFLA_003400	0.401277	1	-0.382506	1
AFLA_003410	1.31257	1	-0.187	1
AFLA_003420	2.22e-15	1	0.282524	1
AFLA_003430	-0.165715	1	0.921872	1
AFLA_003440	2.22e-15	1	0.282524	1
AFLA_003450	-0.60064	1	-1.38253	0.615289
AFLA_003460	2.22e-15	1	2.22e-15	1
AFLA_003470	-0.163715	1	-0.771916	1
AFLA_003480	2.22e-15	1	2.22e-15	1
AFLA_003490	0.456662	1	1.57424	0.943904
AFLA_003500	-0.329256	1	-0.879483	1
AFLA_003510	0.558798	1	2.22e-15	1
AFLA_003520	0.961358	0.99165	1.25467	0.885482
AFLA_003530	-0.5188	1	0.27794	1
AFLA_003540	-1.06868	1	-0.527714	1
AFLA_003550	2.22e-15	1	0.642941	1
AFLA_003560	2.22e-15	1	2.22e-15	1
AFLA_003570	2.22e-15	1	2.22e-15	1
AFLA_003580	2.22e-15	1	2.22e-15	1
AFLA_003590	0.332207	1	2.22e-15	1
AFLA_003600	2.22e-15	1	2.22e-15	1
AFLA_003610	-1.2397	1	-1.29759	1
AFLA_003620	-2.49785	1	-1.10327	1
AFLA_003630	2.22e-15	1	0.88217	1
AFLA_003640	0.263881	1	2.22e-15	1
AFLA_003650	1.39974	0.301219	2.22e-15	1
AFLA_003660	2.22e-15	1	2.22e-15	1
AFLA_003670	0.263881	1	1.5581	1
AFLA_003680	-0.622058	1	0.0699492	1
AFLA_003690	0.263881	1	2.22e-15	1
AFLA_003700	2.16114	0.957891	0.642941	1
AFLA_003710	-0.763235	1	-0.730377	1
AFLA_003720	2.22e-15	1	2.22e-15	1
AFLA_003730	1.20025	1	0.407913	1
AFLA_003740	2.22e-15	1	0.485013	1
AFLA_003750	-0.177649	1	-1.11849	0.470814
AFLA_003760	1.88623	0.824613	2.12681	0.83901
AFLA_003770	2.22e-15	1	0.485013	1
AFLA_003780	0.263881	1	0.9774	1
AFLA_003790	2.66e-15	1	0.583513	1
AFLA_003800	2.22e-15	1	2.22e-15	1
AFLA_003810	2.22e-15	1	0.772428	1
AFLA_003820	2.22e-15	1	2.22e-15	1
AFLA_003830	2.22e-15	1	0.282524	1
AFLA_003840	2.22e-15	1	0.300989	1
AFLA_003850	2.22e-15	1	2.22e-15	1
AFLA_003860	-1.62034	1	-2.12319	1
AFLA_003870	-2.05045	0.363145	-0.925287	0.998392
AFLA_003880	-0.46404	1	0.346148	1
AFLA_003890	0.0519378	1	-0.164866	1
AFLA_003900	0.263881	1	0.676206	1
AFLA_003910	-0.448631	1	0.797305	0.998091
AFLA_003920	1.74734	1	1.07342	1
AFLA_003930	-0.0200566	1	-1.463	0.780436
AFLA_003940	0.836536	1	-0.548443	1
AFLA_003950	0.432044	1	-0.403708	1
AFLA_003960	2.22e-15	1	2.22e-15	1
AFLA_003970	2.22e-15	1	2.22e-15	1
AFLA_003980	2.22e-15	1	2.22e-15	1
AFLA_003990	2.22e-15	1	2.22e-15	1
AFLA_004000	2.22e-15	1	2.22e-15	1
AFLA_004010	2.22e-15	1	2.22e-15	1
AFLA_004020	0.269479	1	-0.332493	1
AFLA_004030	2.22e-15	1	0.282524	1
AFLA_004040	-0.559696	1	-1.11849	1
AFLA_004050	-1.04292	0.528356	-0.49072	1
AFLA_004060	1.60396	0.781217	0.642941	1
AFLA_004070	2.22e-15	1	2.22e-15	1
AFLA_004080	0.750851	1	0.10007	1
AFLA_004090	0.263881	1	0.300989	1
AFLA_004100	2.22e-15	1	2.22e-15	1
AFLA_004110	2.22e-15	1	2.22e-15	1
AFLA_004120	-0.66503	5.89e-05	-0.66503	5.81e-05
AFLA_004130	2.22e-15	1	2.22e-15	1
AFLA_004140	2.22e-15	1	2.22e-15	1
AFLA_004150	2.22e-15	1	2.22e-15	1
AFLA_004160	-2.0464	0.797216	-1.70395	1
AFLA_004170	0.263881	1	0.642941	1
AFLA_004180	-1.00633	1	-1.463	1
AFLA_004190	0.608637	1	0.282524	1
AFLA_004200	2.22e-15	1	2.22e-15	1
AFLA_004210	0.263881	1	2.22e-15	1
AFLA_004220	2.22e-15	1	2.22e-15	1
AFLA_004230	2.22e-15	1	2.22e-15	1
AFLA_004240	2.22e-15	1	2.22e-15	1
AFLA_004250	0.263881	1	0.282524	1
AFLA_004260	2.22e-15	1	2.22e-15	1
AFLA_004270	2.22e-15	1	2.22e-15	1
AFLA_004280	-1.11849	0.699588	-0.817505	1
AFLA_004290	2.22e-15	1	2.22e-15	1
AFLA_004300	2.22e-15	1	2.22e-15	1
AFLA_004310	2.22e-15	1	2.22e-15	1
AFLA_004320	2.22e-15	1	0.88217	1
AFLA_004330	2.22e-15	1	2.22e-15	1
AFLA_004340	2.22e-15	1	2.22e-15	1
AFLA_004350	0.456662	1	2.22e-15	1
AFLA_004360	0.332207	1	2.22e-15	1
AFLA_004370	0.608637	1	2.22e-15	1
AFLA_004380	1.02866	1	0.98892	1
AFLA_004390	-3.10648	0.613829	-3.10648	0.704403
AFLA_004400	2.22e-15	1	2.22e-15	1
AFLA_004410	2.22e-15	1	0.300989	1
AFLA_004420	2.22e-15	1	0.583513	0.00216127
AFLA_004430	2.22e-15	1	2.22e-15	1
AFLA_004440	2.22e-15	1	2.22e-15	1
AFLA_004450	-1.02214	1	0.127467	1
AFLA_004460	2.22e-15	1	2.22e-15	1
AFLA_004470	2.22e-15	1	2.22e-15	1
AFLA_004480	-0.661832	1	-0.332493	1
AFLA_004490	2.22e-15	1	2.22e-15	1
AFLA_004500	2.22e-15	1	0.282524	1
AFLA_004510	1.73806	0.782524	-1.01507	1
AFLA_004520	2.22e-15	1	2.22e-15	1
AFLA_004530	0.726266	1	0.270368	1
AFLA_004540	-1.9738	7.12e-06	-1.9738	7.12e-06
AFLA_004550	0.558798	1	0.300989	1
AFLA_004560	-1.57552	1	-0.157791	1
AFLA_004570	-1.11849	2.19e-05	-1.11849	2.19e-05
AFLA_004580	0.596088	1	1.81304	0.498896
AFLA_004590	-1.11849	0.952458	-0.60577	1
AFLA_004600	-0.66503	0.828358	-0.364041	1
AFLA_004610	-0.978949	1	0.459408	1
AFLA_004620	-0.622058	1	-1.16201	1
AFLA_004630	0.0690693	1	-0.382506	1
AFLA_004640	-1.53458	1	-1.00301	1
AFLA_004650	-0.66503	0.828358	-0.364041	1
AFLA_004660	-1.21422	0.986604	0.282336	1
AFLA_004670	1.69867	0.403157	0.943295	0.890717
AFLA_004680	-0.854613	1	1.06869	1
AFLA_004690	2.22e-15	1	2.22e-15	1
AFLA_004700	0.275815	1	1.23416	0.417774
AFLA_004710	-1.54551	1	-2.15481	1
AFLA_004720	0.151902	1	-0.886533	1
AFLA_004730	0.758165	1	-0.187993	1
AFLA_004740	1.8106	0.863254	0.159895	1
AFLA_004750	1.0293	1	0.640475	1
AFLA_004760	0.757494	1	1.57267	1
AFLA_004770	0.456662	1	2.22e-15	1
AFLA_004780	2.22e-15	1	2.22e-15	1
AFLA_004790	0.790843	1	-0.237844	1
AFLA_004800	1.43835	1	2.66e-15	1
AFLA_004810	2.22e-15	1	2.22e-15	1
AFLA_004820	-0.525528	1	-0.0282935	1
AFLA_004830	1.12418	1	0.295655	1
AFLA_004840	1.08649	1	0.282524	1
AFLA_004850	0.263881	1	2.22e-15	1
AFLA_004860	1.08928	1	1.07492	1
AFLA_004870	2.22e-15	1	2.22e-15	1
AFLA_004880	2.22e-15	1	0.95873	0.866795
AFLA_004890	0.263881	1	2.22e-15	1
AFLA_004900	-1.11849	2.19e-05	-1.11849	2.19e-05
AFLA_004910	0.940845	1	0.88217	1
AFLA_004920	2.22e-15	1	0.512724	1
AFLA_004930	2.22e-15	1	1.65361	0.462351
AFLA_004940	0.332207	1	0.485013	1
AFLA_004950	1.29335	1	1.4908	1
AFLA_004960	2.22e-15	1	2.22e-15	1
AFLA_004970	2.22e-15	1	2.22e-15	1
AFLA_004980	2.22e-15	1	2.22e-15	1
AFLA_004990	2.22e-15	1	2.22e-15	1
AFLA_005000	2.22e-15	1	2.22e-15	1
AFLA_005010	0.263881	1	2.22e-15	1
AFLA_005020	2.22e-15	1	2.22e-15	1
AFLA_005030	2.22e-15	1	2.22e-15	1
AFLA_005040	2.22e-15	1	2.22e-15	1
AFLA_005050	-0.56774	1	0.0576908	1
AFLA_005070	2.22e-15	1	2.22e-15	1
AFLA_005080	2.22e-15	1	2.22e-15	1
AFLA_005090	2.22e-15	1	2.22e-15	1
AFLA_005100	2.22e-15	1	2.22e-15	1
AFLA_005110	-1.32391	1	-0.518415	1
AFLA_005120	2.22e-15	1	2.22e-15	1
AFLA_005130	2.22e-15	1	2.22e-15	1
AFLA_005140	2.22e-15	1	2.22e-15	1
AFLA_005150	2.22e-15	1	2.22e-15	1
AFLA_005160	2.22e-15	1	2.22e-15	1
AFLA_005170	2.22e-15	1	2.22e-15	1
AFLA_005180	2.22e-15	1	2.22e-15	1
AFLA_005190	2.22e-15	1	2.22e-15	1
AFLA_005200	2.22e-15	1	2.22e-15	1
AFLA_005210	2.22e-15	1	2.22e-15	1
AFLA_005220	2.22e-15	1	2.22e-15	1
AFLA_005230	2.22e-15	1	2.22e-15	1
AFLA_005240	2.22e-15	1	2.22e-15	1
AFLA_005250	0.734099	1	2.22e-15	1
AFLA_005260	2.22e-15	1	2.22e-15	1
AFLA_005270	2.22e-15	1	2.22e-15	1
AFLA_005280	2.22e-15	1	0.512724	1
AFLA_005290	2.22e-15	1	2.22e-15	1
AFLA_005300	2.22e-15	1	2.22e-15	1
AFLA_005310	0.456662	1	0.300989	1
AFLA_005320	0.263881	1	2.22e-15	1
AFLA_005330	2.22e-15	1	2.22e-15	1
AFLA_005340	2.22e-15	1	2.22e-15	1
AFLA_005350	2.22e-15	1	2.22e-15	1
AFLA_005360	2.22e-15	1	0.642941	1
AFLA_005370	0.456662	1	2.22e-15	1
AFLA_005380	2.22e-15	1	2.22e-15	1
AFLA_005390	2.22e-15	1	2.22e-15	1
AFLA_005400	2.22e-15	1	2.22e-15	1
AFLA_005410	-0.446623	1	-0.667748	1
AFLA_005420	0.456662	1	0.809397	1
AFLA_005430	2.22e-15	1	2.22e-15	1
AFLA_005440	0.683551	1	0.93189	1
AFLA_005450	0.332207	1	0.642941	1
AFLA_005460	2.22e-15	1	2.22e-15	1
AFLA_005470	-0.66503	5.89e-05	-0.66503	5.81e-05
AFLA_005480	2.22e-15	1	2.22e-15	1
AFLA_005490	0.263881	1	2.22e-15	1
AFLA_005500	0.332207	1	2.22e-15	1
AFLA_005510	-0.52394	1	-2.36196	0.601299
AFLA_005520	0.263881	1	0.809397	1
AFLA_005530	2.22e-15	1	2.22e-15	1
AFLA_005540	2.22e-15	1	2.22e-15	1
AFLA_005550	0.544937	1	-0.384125	1
AFLA_005560	0.263881	1	2.22e-15	1
AFLA_005570	-0.479635	1	-0.443684	1
AFLA_005580	2.22e-15	1	2.22e-15	1
AFLA_005590	2.1513	1	1.77249	1
AFLA_005600	-0.15648	1	0.728644	1
AFLA_005610	-0.223104	1	-0.605835	0.792245
AFLA_005620	-0.38531	1	-0.751967	1
AFLA_005630	-0.401149	1	0.602296	1
AFLA_005640	-0.0108892	1	-0.0402777	1
AFLA_005650	-0.557125	1	-1.05822	1
AFLA_005660	2.22e-15	1	2.22e-15	1
AFLA_005670	-1.94831	1	-1.48811	1
AFLA_005680	-1.89361	0.416917	-1.76676	0.50255
AFLA_005690	2.66e-15	1	0.282524	1
AFLA_005700	-0.78377	1	-0.131474	1
AFLA_005710	2.22e-15	1	0.300989	1
AFLA_005720	0.840939	1	0.300989	1
AFLA_005730	-3.52867	0.961982	-1.93175	1
AFLA_005740	0.425286	1	-0.364041	1
AFLA_005750	-1.89847	0.795944	1.36177	1
AFLA_005760	-1.11849	2.19e-05	-1.11849	2.19e-05
AFLA_005770	-1.58114	1	0.395184	1
AFLA_005780	0.855972	1	1.41925	1
AFLA_005790	2.22e-15	1	2.22e-15	1
AFLA_005800	0.253256	1	-0.176245	1
AFLA_005810	2.22e-15	1	0.786001	0.437882
AFLA_005820	0.734099	1	2.22e-15	1
AFLA_005830	0.608637	1	0.676206	1
AFLA_005840	-2.64982	0.497824	-2.82396	0.498896
AFLA_005850	0.840939	1	0.512724	1
AFLA_005860	2.22e-15	1	2.22e-15	1
AFLA_005870	2.22e-15	1	2.22e-15	1
AFLA_005880	-0.602932	1	0.552352	1
AFLA_005890	-1.66617	1	-2.50711	0.832517
AFLA_005900	-0.245069	1	0.284987	1
AFLA_005910	1.86151	0.889324	0.642941	1
AFLA_005920	0.594682	1	0.43619	1
AFLA_005930	0.157648	1	-0.66503	0.921295
AFLA_005940	0.523271	1	-0.120284	1
AFLA_005950	0.456662	1	0.512724	1
AFLA_005960	1.71097	1	2.66e-15	1
AFLA_005970	0.332207	1	0.282524	1
AFLA_005980	1.08649	1	2.22e-15	1
AFLA_005990	2.22e-15	1	2.22e-15	1
AFLA_006000	0.725353	1	0.427812	1
AFLA_006010	0.279582	1	0.454848	1
AFLA_006020	-1.29166	1	-0.994442	1
AFLA_006030	2.22e-15	1	0.485013	1
AFLA_006040	-0.652294	1	0.0588521	1
AFLA_006050	2.22e-15	1	2.22e-15	1
AFLA_006060	-0.81469	1	0.674039	1
AFLA_006070	0.332207	1	1.50402	0.875627
AFLA_006080	2.22e-15	1	2.22e-15	1
AFLA_006090	0.456662	1	2.22e-15	1
AFLA_006100	-0.675331	1	-0.417992	1
AFLA_006110	2.29222	0.770769	1.39489	1
AFLA_006120	-1.3468	1	-0.133314	1
AFLA_006130	0.641368	1	0.0573379	1
AFLA_006140	-2.40881	0.00577935	-1.31333	0.0374102
AFLA_006150	1.13374	1	1.81304	1
AFLA_006160	2.44484	0.811534	0.353973	1
AFLA_006170	-1.39569	0.799647	-1.09206	1
AFLA_006180	0.163296	1	0.38829	1
AFLA_006190	2.22e-15	1	2.22e-15	1
AFLA_006200	0.263881	1	2.22e-15	1
AFLA_006210	-0.149045	1	-0.17767	1
AFLA_006220	-0.737925	1	0.188283	1
AFLA_006230	1.19549	1	1.07062	1
AFLA_006240	-1.90889	1	-1.28185	1
AFLA_006250	-0.0464002	1	-0.687894	1
AFLA_006260	-0.00684133	1	-0.0997293	1
AFLA_006270	-1.08459	1	-0.91744	1
AFLA_006280	-0.66503	0.617723	-0.0815169	1
AFLA_006290	0.260158	1	0.686318	1
AFLA_006300	-0.958337	0.0794497	0.664439	0.193904
AFLA_006310	-0.28675	1	-1.94653	1
AFLA_006320	-0.386763	1	-1.40549	0.998392
AFLA_006330	0.376933	1	0.194055	1
AFLA_006340	0.44557	1	-1.18047	0.970917
AFLA_006350	-0.208368	1	-0.66503	1
AFLA_006360	1.06631	1	0.485013	1
AFLA_006370	0.0165674	1	0.968752	0.780436
AFLA_006380	0.456662	1	1.51707	1
AFLA_006390	-2.64856	0.280284	-2.13584	0.447806
AFLA_006400	-1.03982	1	-1.46107	1
AFLA_006410	-1.73947	1	-0.377318	1
AFLA_006420	0.456662	1	2.22e-15	1
AFLA_006430	-2.35027	6.51e-06	-2.35027	6.51e-06
AFLA_006440	2.22e-15	1	0.282524	1
AFLA_006450	0.0364221	1	-0.765351	0.787071
AFLA_006460	-2.64856	0.22685	-2.64856	0.248138
AFLA_006470	2.22e-15	1	2.22e-15	1
AFLA_006490	-0.401149	1	1.3421	1
AFLA_006500	-0.401149	1	0.916795	0.993161
AFLA_006520	-1.71824	1	-1.83091	1
AFLA_006530	-2.89574	0.904667	-0.616907	1
AFLA_006540	-1.02669	1	-0.0238071	1
AFLA_006550	-1.83535	0.961982	-0.308727	1
AFLA_006560	0.263881	1	0.282524	1
AFLA_006570	0.950235	0.638554	0.251844	1
AFLA_006580	0.0217317	1	-0.294375	1
AFLA_006590	-0.208368	1	-0.382506	1
AFLA_006600	2.22e-15	1	2.22e-15	1
AFLA_006610	0.608637	1	0.300989	1
AFLA_006620	2.22e-15	1	2.22e-15	1
AFLA_006630	2.22e-15	1	1.27839	1
AFLA_006640	2.22e-15	1	2.22e-15	1
AFLA_006650	0.940845	0.746475	1.79143	0.350284
AFLA_006660	0.263881	1	0.583513	1
AFLA_006670	-0.374627	1	-2.3436	0.278533
AFLA_006680	-1.463	0.573426	-1.463	0.64785
AFLA_006690	0.596088	0.0870287	2.22e-15	1
AFLA_006700	2.22e-15	1	2.22e-15	1
AFLA_006710	2.22e-15	1	2.22e-15	1
AFLA_006720	0.263881	1	0.9774	1
AFLA_006730	2.22e-15	1	2.22e-15	1
AFLA_006740	0.613597	1	0.198948	1
AFLA_006750	1.61711	0.798575	1.25966	1
AFLA_006760	0.596088	0.0943894	0.583513	0.105967
AFLA_006770	-0.66503	1	-0.382506	1
AFLA_006780	1.38667	1	1.10288	1
AFLA_006790	-0.805801	1	-1.16711	1
AFLA_006800	0.347707	1	0.41773	1
AFLA_006810	2.22e-15	1	2.22e-15	1
AFLA_006820	0.632037	1	0.497068	1
AFLA_006830	-0.661832	1	-0.83597	1
AFLA_006840	0.78887	1	0.282524	1
AFLA_006850	-0.0495906	1	-0.0955893	1
AFLA_006860	0.174403	1	0.0183382	1
AFLA_006870	-0.415491	1	-1.47219	0.992373
AFLA_006880	-0.854613	1	-0.332493	1
AFLA_006890	0.654437	0.0766237	0.173689	0.841013
AFLA_006900	-0.66503	0.828811	-0.364041	1
AFLA_006910	2.22e-15	1	2.22e-15	1
AFLA_006920	0.275815	1	0.332706	1
AFLA_006930	4.58653	0.623917	-0.25797	1
AFLA_006940	-0.507056	1	-0.0978788	1
AFLA_006950	-2.50711	0.551913	-1.20559	1
AFLA_006960	-0.318363	1	1.30134	1
AFLA_006970	-1.36516	1	-0.90038	1
AFLA_006980	-0.239922	1	-0.568045	1
AFLA_006990	2.22e-15	1	1.90117	0.202249
AFLA_007000	1.93538	0.851127	0.997736	1
AFLA_007010	0.734099	1	1.13683	1
AFLA_007020	-0.661832	1	1.23056	1
AFLA_007030	1.83823	1	1.49012	1
AFLA_007040	1.10128	0.626162	0.749901	0.999289
AFLA_007050	0.620085	1	1.89669	1
AFLA_007060	0.321247	1	-0.382506	1
AFLA_007070	-1.5174	0.825991	-1.57559	0.898696
AFLA_007080	0.576553	1	0.806348	1
AFLA_007090	-0.715188	0.934337	-1.54398	0.443994
AFLA_007100	1.11333	0.961786	0.65032	1
AFLA_007110	-1.03964	0.959398	-0.206	1
AFLA_007120	0.526843	0.952458	1.42927	0.303104
AFLA_007130	-0.293949	1	-0.528034	1
AFLA_007140	-0.725426	1	-0.236871	1
AFLA_007150	-1.44018	1	-1.66156	1
AFLA_007160	-0.19262	1	1.09888	0.970917
AFLA_007170	1.34858	1	2.34905	0.998392
AFLA_007180	2.22e-15	1	1.56473	0.262474
AFLA_007190	-0.929677	1	1.73577	0.951834
AFLA_007200	0.67431	1	-0.299299	1
AFLA_007210	-1.46297	1	0.170282	1
AFLA_007220	-4.54636	0.729811	-0.0197972	1
AFLA_007230	0.608637	1	0.921786	1
AFLA_007240	1.15738	1	0.786001	1
AFLA_007250	-0.871027	1	-1.22816	1
AFLA_007350	2.22e-15	1	2.22e-15	1
AFLA_007360	2.22e-15	1	2.22e-15	1
AFLA_007370	2.22e-15	1	2.22e-15	1
AFLA_007380	2.22e-15	1	2.22e-15	1
AFLA_007390	2.22e-15	1	2.22e-15	1
AFLA_007400	2.22e-15	1	2.22e-15	1
AFLA_007410	2.22e-15	1	2.22e-15	1
AFLA_007420	2.22e-15	1	2.22e-15	1
AFLA_007430	2.22e-15	1	2.22e-15	1
AFLA_007440	2.22e-15	1	2.22e-15	1
AFLA_007450	2.22e-15	1	2.22e-15	1
AFLA_007460	2.22e-15	1	2.22e-15	1
AFLA_007470	2.22e-15	1	2.22e-15	1
AFLA_007480	2.22e-15	1	2.22e-15	1
AFLA_007490	2.22e-15	1	2.22e-15	1
AFLA_007500	2.22e-15	1	2.22e-15	1
AFLA_007510	2.22e-15	1	2.22e-15	1
AFLA_007520	2.22e-15	1	2.22e-15	1
AFLA_007530	2.22e-15	1	2.22e-15	1
AFLA_007540	2.22e-15	1	2.22e-15	1
AFLA_007550	2.22e-15	1	2.22e-15	1
AFLA_007560	2.22e-15	1	2.22e-15	1
AFLA_007570	2.22e-15	1	2.22e-15	1
AFLA_007580	2.22e-15	1	2.22e-15	1
AFLA_007590	2.22e-15	1	2.22e-15	1
AFLA_007600	2.22e-15	1	2.22e-15	1
AFLA_007610	2.22e-15	1	2.22e-15	1
AFLA_007620	2.22e-15	1	2.22e-15	1
AFLA_007630	2.22e-15	1	2.22e-15	1
AFLA_007640	2.22e-15	1	2.22e-15	1
AFLA_007650	2.22e-15	1	2.22e-15	1
AFLA_007660	2.22e-15	1	2.22e-15	1
AFLA_007670	2.22e-15	1	2.22e-15	1
AFLA_007680	2.22e-15	1	2.22e-15	1
AFLA_007690	2.22e-15	1	2.22e-15	1
AFLA_007700	2.22e-15	1	0.795248	1
AFLA_007710	2.22e-15	1	2.22e-15	1
AFLA_007720	2.22e-15	1	2.22e-15	1
AFLA_007730	0.869859	1	0.282524	1
AFLA_007740	2.22e-15	1	2.22e-15	1
AFLA_007750	2.22e-15	1	2.22e-15	1
AFLA_007760	0.440099	1	-0.818132	1
AFLA_007770	2.17342	0.734314	1.0521	1
AFLA_007780	-0.106402	1	-0.366975	1
AFLA_007790	-0.742789	1	-1.19461	1
AFLA_007800	-0.66503	1	0.602296	1
AFLA_007810	-1.2974	1	0.748913	1
AFLA_007820	2.22e-15	1	0.642941	1
AFLA_007830	-2.12894	0.81918	-1.02279	1
AFLA_007840	0.815292	1	1.87954	1
AFLA_007850	-0.581363	1	0.0157746	1
AFLA_007860	0.456662	1	0.282524	1
AFLA_007870	-1.26826	1	0.350384	1
AFLA_007880	2.22e-15	1	2.22e-15	1
AFLA_007890	-0.866908	1	-0.977984	1
AFLA_007900	0.263881	1	2.22e-15	1
AFLA_007910	0.263881	1	2.22e-15	1
AFLA_007920	2.22e-15	1	0.485013	1
AFLA_007930	-0.2818	1	-0.570872	1
AFLA_007940	-0.662432	1	-1.08805	1
AFLA_007950	2.22e-15	1	1.019	1
AFLA_007960	0.401277	1	0.760324	1
AFLA_007970	0.456662	1	2.22e-15	1
AFLA_007980	2.22e-15	1	2.22e-15	1
AFLA_007990	2.22e-15	1	2.22e-15	1
AFLA_008000	2.22e-15	1	0.512724	1
AFLA_008010	2.22e-15	1	2.22e-15	1
AFLA_008020	2.22e-15	1	2.22e-15	1
AFLA_008030	2.22e-15	1	2.22e-15	1
AFLA_008040	2.22e-15	1	2.22e-15	1
AFLA_008050	2.22e-15	1	2.22e-15	1
AFLA_008060	-0.341527	1	-0.0792761	1
AFLA_008070	2.22e-15	1	2.22e-15	1
AFLA_008080	2.22e-15	1	2.22e-15	1
AFLA_008090	2.22e-15	1	0.809397	1
AFLA_008100	2.22e-15	1	2.22e-15	1
AFLA_008110	1.44294	0.797216	1.31915	0.957155
AFLA_008120	0.263881	1	2.22e-15	1
AFLA_008130	1.34971	1	1.86175	1
AFLA_008140	-0.834968	1	-1.60675	1
AFLA_008150	2.22e-15	1	2.22e-15	1
AFLA_008160	2.22e-15	1	2.22e-15	1
AFLA_008170	2.22e-15	1	2.22e-15	1
AFLA_008180	0.730967	1	2.22e-15	1
AFLA_008190	-0.184457	1	0.561327	0.980178
AFLA_008200	0.484936	1	0.133093	1
AFLA_008210	0.138892	1	-0.508362	1
AFLA_008220	-0.0199436	1	0.991844	0.628984
AFLA_008230	2.22e-15	1	2.22e-15	1
AFLA_008240	-0.0200566	1	-1.463	1
AFLA_008250	0.332207	1	2.22e-15	1
AFLA_008260	0.840675	0.770769	0.955685	0.768856
AFLA_008270	2.22e-15	1	2.22e-15	1
AFLA_008280	-0.166563	1	-0.399515	1
AFLA_008290	0.232133	1	0.101731	1
AFLA_008300	-2.31635	0.578144	-2.00562	0.780436
AFLA_008310	-0.866908	1	-1.16201	1
AFLA_008320	-0.132947	1	-0.252875	0.958219
AFLA_008330	0.332088	1	0.38374	1
AFLA_008340	2.22e-15	1	0.282524	1
AFLA_008350	1.7108	0.998049	1.83739	1
AFLA_008360	2.22e-15	1	2.22e-15	1
AFLA_008370	0.601154	1	0.2789	1
AFLA_008380	2.22e-15	1	2.22e-15	1
AFLA_008390	1.16744	0.00497444	2.22e-15	1
AFLA_008400	2.22e-15	1	0.282524	1
AFLA_008410	2.22e-15	1	2.22e-15	1
AFLA_008420	-2.23663	0.797216	-2.82396	0.725521
AFLA_008430	2.22e-15	1	2.22e-15	1
AFLA_008440	2.22e-15	1	0.9774	1
AFLA_008450	2.22e-15	1	2.22e-15	1
AFLA_008460	0.0548178	1	0.579015	1
AFLA_008470	2.22e-15	1	0.300989	1
AFLA_008480	0.263881	1	0.300989	1
AFLA_008490	2.22e-15	1	2.22e-15	1
AFLA_008500	2.22e-15	1	2.67769	0.541801
AFLA_008510	2.22e-15	1	2.22e-15	1
AFLA_008520	-0.66503	1	0.539996	1
AFLA_008530	0.263881	1	0.94393	0.970917
AFLA_008550	0.332207	1	2.22e-15	1
AFLA_008560	2.22e-15	1	2.22e-15	1
AFLA_008570	0.332207	1	2.22e-15	1
AFLA_008580	-2.37239	1	-1.57354	1
AFLA_008590	2.22e-15	1	2.22e-15	1
AFLA_008600	-2.17428	0.363145	-1.68927	0.5817
AFLA_008610	2.22e-15	1	2.22e-15	1
AFLA_008620	0.710793	1	-0.18251	1
AFLA_008630	-2.64856	0.418774	-2.00562	0.685335
AFLA_008640	-0.952017	1	-1.74089	1
AFLA_008650	2.22e-15	1	2.22e-15	1
AFLA_008660	2.22e-15	1	2.22e-15	1
AFLA_008670	2.22e-15	1	2.22e-15	1
AFLA_008680	2.29269	0.852932	-0.323246	1
AFLA_008690	2.22e-15	1	2.22e-15	1
AFLA_008700	2.22e-15	1	2.22e-15	1
AFLA_008710	2.22e-15	1	2.22e-15	1
AFLA_008720	1.73932	0.595651	0.2937	1
AFLA_008730	0.204829	1	-0.66503	1
AFLA_008740	0.263881	1	0.485013	1
AFLA_008750	2.22e-15	1	2.22e-15	1
AFLA_008760	0.596088	0.850082	2.22e-15	1
AFLA_008770	0.263881	1	1.26733	1
AFLA_008780	0.263881	1	2.22e-15	1
AFLA_008790	2.22e-15	1	2.22e-15	1
AFLA_008800	2.22e-15	1	2.22e-15	1
AFLA_008810	2.22e-15	1	2.22e-15	1
AFLA_008820	2.22e-15	1	2.22e-15	1
AFLA_008830	-0.0621521	1	-0.675317	1
AFLA_008840	-1.99105	1	-2.29978	1
AFLA_008850	2.22e-15	1	2.22e-15	1
AFLA_008860	2.22e-15	1	2.22e-15	1
AFLA_008870	-0.66503	5.89e-05	-0.66503	5.81e-05
AFLA_008880	2.22e-15	1	2.22e-15	1
AFLA_008890	2.22e-15	1	2.22e-15	1
AFLA_008900	2.22e-15	1	2.22e-15	1
AFLA_008910	2.41454	0.910417	0.735938	1
AFLA_008920	1.6585	0.983234	1.87393	0.98288
AFLA_008930	2.22e-15	1	2.22e-15	1
AFLA_008940	2.22e-15	1	2.22e-15	1
AFLA_008950	2.22e-15	1	2.22e-15	1
AFLA_008960	0.332207	1	2.22e-15	1
AFLA_008970	2.22e-15	1	0.282524	1
AFLA_008980	0.492349	1	-0.180017	1
AFLA_008990	2.22e-15	1	2.22e-15	1
AFLA_009000	2.34319	0.837509	3.24766	0.704403
AFLA_009010	-0.95494	0.808273	0.345199	1
AFLA_009020	3.02093	1	1.72825	1
AFLA_009030	-1.15231	1	-0.775385	1
AFLA_009040	0.451908	1	-0.61813	1
AFLA_009050	2.22e-15	1	2.22e-15	1
AFLA_009060	2.22e-15	1	2.22e-15	1
AFLA_009070	-0.0563924	1	0.130218	1
AFLA_009080	0.089715	1	0.269088	1
AFLA_009090	2.17452	1	2.22e-15	1
AFLA_009100	0.596088	1	1.44863	0.747543
AFLA_009110	-0.661832	1	-0.309097	1
AFLA_009120	-0.724513	1	-1.74089	1
AFLA_009130	0.263881	1	0.300989	1
AFLA_009140	0.425286	1	0.620122	1
AFLA_009150	-2.50711	6.51e-06	-2.50711	6.51e-06
AFLA_009160	1.65185	1	1.9833	1
AFLA_009170	-0.396749	1	-2.17428	0.848759
AFLA_009180	2.22e-15	1	2.22e-15	1
AFLA_009190	0.78887	0.707625	2.22e-15	1
AFLA_009200	-2.54824	0.485941	-2.49218	0.552802
AFLA_009210	0.263881	1	1.07342	1
AFLA_009220	2.02047	0.133035	0.795248	0.750794
AFLA_009230	2.66e-15	1	2.22e-15	1
AFLA_009240	2.22e-15	1	2.22e-15	1
AFLA_009250	-0.586529	1	0.206084	1
AFLA_009260	0.263881	1	2.22e-15	1
AFLA_009270	2.22e-15	1	2.22e-15	1
AFLA_009280	0.456662	1	2.22e-15	1
AFLA_009290	2.22e-15	1	2.22e-15	1
AFLA_009300	2.22e-15	1	2.22e-15	1
AFLA_009310	2.22e-15	1	2.22e-15	1
AFLA_009320	2.22e-15	1	0.300989	1
AFLA_009330	2.22e-15	1	2.22e-15	1
AFLA_009340	2.22e-15	1	2.22e-15	1
AFLA_009350	-1.13079	0.545661	-0.46526	1
AFLA_009360	2.22e-15	1	2.22e-15	1
AFLA_009370	0.608637	1	1.25042	1
AFLA_009380	0.608637	1	2.22e-15	1
AFLA_009390	-0.574061	1	-0.836965	1
AFLA_009400	0.840939	1	0.795248	1
AFLA_009410	2.29578	0.238736	1.04012	0.83901
AFLA_009420	-0.0872908	1	0.609837	1
AFLA_009430	2.22e-15	1	2.22e-15	1
AFLA_009440	0.263881	1	0.512724	1
AFLA_009450	-0.10212	1	0.345246	1
AFLA_009460	-1.28422	0.828358	-1.45836	0.841013
AFLA_009470	2.70989	0.745845	0.300989	1
AFLA_009480	1.30713	0.719689	1.96109	0.491738
AFLA_009490	0.332207	1	2.22e-15	1
AFLA_009500	2.22e-15	1	2.22e-15	1
AFLA_009510	2.22e-15	1	2.22e-15	1
AFLA_009520	2.22e-15	1	0.300989	1
AFLA_009530	2.22e-15	1	2.22e-15	1
AFLA_009540	2.22e-15	1	2.22e-15	1
AFLA_009550	2.22e-15	1	2.66e-15	1
AFLA_009560	2.22e-15	1	2.22e-15	1
AFLA_009570	2.22e-15	1	2.22e-15	1
AFLA_009580	2.22e-15	1	2.22e-15	1
AFLA_009590	0.263881	1	2.22e-15	1
AFLA_009600	2.22e-15	1	2.22e-15	1
AFLA_009610	2.22e-15	1	2.22e-15	1
AFLA_009620	2.22e-15	1	2.22e-15	1
AFLA_009630	2.22e-15	1	2.22e-15	1
AFLA_009640	2.22e-15	1	2.22e-15	1
AFLA_009650	2.22e-15	1	2.22e-15	1
AFLA_009660	2.22e-15	1	2.22e-15	1
AFLA_009670	2.22e-15	1	2.22e-15	1
AFLA_009680	2.22e-15	1	2.22e-15	1
AFLA_009690	2.22e-15	1	2.22e-15	1
AFLA_009700	2.22e-15	1	2.22e-15	1
AFLA_009710	2.22e-15	1	2.22e-15	1
AFLA_009720	-0.200931	1	-0.933282	1
AFLA_009730	1.97774	0.801713	1.40289	1
AFLA_009740	-0.952017	1	1.12756	1
AFLA_009750	0.545719	1	-0.41573	1
AFLA_009760	0.840939	1	2.22e-15	1
AFLA_009770	0.263881	1	0.300989	1
AFLA_009780	2.22e-15	1	2.22e-15	1
AFLA_009790	2.22e-15	1	2.22e-15	1
AFLA_009800	2.22e-15	1	0.809397	1
AFLA_009810	2.22e-15	1	2.22e-15	1
AFLA_009820	0.263881	1	2.22e-15	1
AFLA_009830	2.22e-15	1	2.22e-15	1
AFLA_009840	2.22e-15	1	2.22e-15	1
AFLA_009850	2.22e-15	1	2.22e-15	1
AFLA_009860	2.22e-15	1	2.22e-15	1
AFLA_009870	2.22e-15	1	2.22e-15	1
AFLA_009880	2.22e-15	1	2.22e-15	1
AFLA_009890	2.22e-15	1	2.22e-15	1
AFLA_009900	2.22e-15	1	0.676206	1
AFLA_009910	-1.9738	0.000204327	-1.9738	0.00020305
AFLA_009920	2.22e-15	1	2.22e-15	1
AFLA_009930	2.22e-15	1	0.642941	1
AFLA_009940	2.22e-15	1	2.22e-15	1
AFLA_009950	2.22e-15	1	2.22e-15	1
AFLA_009960	2.22e-15	1	2.22e-15	1
AFLA_009970	2.22e-15	1	2.22e-15	1
AFLA_009980	2.22e-15	1	0.676206	1
AFLA_009990	2.22e-15	1	2.22e-15	1
AFLA_010000	-0.169552	1	-0.110731	1
AFLA_010010	0.604232	0.358787	0.447122	0.615289
AFLA_010020	-0.257835	1	-0.660419	1
AFLA_010030	2.22e-15	1	2.22e-15	1
AFLA_010040	2.22e-15	1	2.22e-15	1
AFLA_010050	2.22e-15	1	2.22e-15	1
AFLA_010060	2.22e-15	1	2.22e-15	1
AFLA_010070	2.22e-15	1	2.22e-15	1
AFLA_010080	-1.70992	1	-0.67227	1
AFLA_010090	2.22e-15	1	2.22e-15	1
AFLA_010100	2.22e-15	1	2.22e-15	1
AFLA_010110	2.22e-15	1	2.22e-15	1
AFLA_010120	-0.66503	5.89e-05	-0.66503	5.81e-05
AFLA_010130	2.01541	0.874144	0.88217	1
AFLA_010140	-0.522152	1	0.588052	1
AFLA_010150	2.22e-15	1	2.22e-15	1
AFLA_010160	2.22e-15	1	2.22e-15	1
AFLA_010170	2.22e-15	1	2.22e-15	1
AFLA_010180	1.18763	0.615203	0.282524	1
AFLA_010190	0.453412	1	-1.11849	1
AFLA_010200	2.22e-15	1	2.22e-15	1
AFLA_010210	0.456662	1	2.22e-15	1
AFLA_010220	2.22e-15	1	2.22e-15	1
AFLA_010230	-0.66503	5.89e-05	-0.66503	5.81e-05
AFLA_010240	0.263881	1	2.22e-15	1
AFLA_010250	2.22e-15	1	2.22e-15	1
AFLA_010260	2.22e-15	1	2.22e-15	1
AFLA_010270	2.22e-15	1	2.22e-15	1
AFLA_010280	2.22e-15	1	2.22e-15	1
AFLA_010290	2.22e-15	1	2.22e-15	1
AFLA_010300	2.22e-15	1	2.22e-15	1
AFLA_010310	2.22e-15	1	2.22e-15	1
AFLA_010320	2.22e-15	1	2.22e-15	1
AFLA_010330	2.22e-15	1	2.22e-15	1
AFLA_010340	0.0690693	1	-0.382506	1
AFLA_010350	-2.17428	0.238736	-1.89176	0.346788
AFLA_010360	2.22e-15	1	2.22e-15	1
AFLA_010370	1.32652	1	2.22e-15	1
AFLA_010380	-2.32071	0.38704	-2.49485	0.369548
AFLA_010390	2.22e-15	1	2.22e-15	1
AFLA_010400	2.22e-15	1	2.22e-15	1
AFLA_010410	2.22e-15	1	2.22e-15	1
AFLA_010420	2.22e-15	1	2.22e-15	1
AFLA_010430	2.22e-15	1	2.22e-15	1
AFLA_010440	0.263881	1	2.22e-15	1
AFLA_010450	2.22e-15	1	2.22e-15	1
AFLA_010460	2.22e-15	1	2.22e-15	1
AFLA_010470	0.456662	1	2.22e-15	1
AFLA_010480	2.22e-15	1	2.22e-15	1
AFLA_010490	2.22e-15	1	2.22e-15	1
AFLA_010500	2.22e-15	1	2.22e-15	1
AFLA_010510	2.22e-15	1	2.22e-15	1
AFLA_010520	2.22e-15	1	2.22e-15	1
AFLA_010530	2.22e-15	1	2.22e-15	1
AFLA_010540	2.22e-15	1	2.22e-15	1
AFLA_010550	-2.50711	0.0779719	-2.50711	0.0736586
AFLA_010560	0.263881	1	0.300989	1
AFLA_010570	2.22e-15	1	2.22e-15	1
AFLA_010580	0.328912	1	0.233907	1
AFLA_010590	1.80657	1	-0.364041	1
AFLA_010600	2.22e-15	1	2.22e-15	1
AFLA_010610	1.98697	0.741273	0.795248	1
AFLA_010620	-0.350274	1	0.563737	0.780436
AFLA_010630	0.797348	1	-0.083776	1
AFLA_010640	2.22e-15	1	2.22e-15	1
AFLA_010650	2.22e-15	1	2.22e-15	1
AFLA_010660	2.22e-15	1	2.22e-15	1
AFLA_010670	2.22e-15	1	2.22e-15	1
AFLA_010680	2.22e-15	1	2.22e-15	1
AFLA_010690	2.22e-15	1	2.22e-15	1
AFLA_010700	-1.77301	1	-2.0221	1
AFLA_010710	2.22e-15	1	2.22e-15	1
AFLA_010720	0.263881	1	2.22e-15	1
AFLA_010730	2.22e-15	1	2.22e-15	1
AFLA_010740	2.22e-15	1	2.22e-15	1
AFLA_010750	2.22e-15	1	2.22e-15	1
AFLA_010760	2.22e-15	1	2.22e-15	1
AFLA_010770	0.840939	1	1.019	1
AFLA_010780	2.22e-15	1	0.921786	1
AFLA_010790	0.429705	1	-0.163023	1
AFLA_010800	0.730967	1	2.22e-15	1
AFLA_010810	2.22e-15	1	2.22e-15	1
AFLA_010820	2.22e-15	1	2.22e-15	1
AFLA_010830	2.22e-15	1	2.22e-15	1
AFLA_010840	2.22e-15	1	2.22e-15	1
AFLA_010850	2.22e-15	1	2.22e-15	1
AFLA_010860	0.263881	1	0.772428	1
AFLA_010870	2.22e-15	1	0.282524	1
AFLA_010880	1.13521	0.736839	1.21001	0.780436
AFLA_010890	0.478431	1	-0.873009	1
AFLA_010900	-0.444121	1	-0.426426	1
AFLA_010910	-2.89562	6.51e-06	-2.89562	6.51e-06
AFLA_010920	0.332207	1	2.22e-15	1
AFLA_010930	2.22e-15	1	2.22e-15	1
AFLA_010940	1.93948	1	0.636497	1
AFLA_010950	2.53124	0.0176481	1.32671	0.10502
AFLA_010960	-1.12822	1	-1.22211	1
AFLA_010970	-1.71762	0.952458	-2.17428	0.871951
AFLA_010980	2.22e-15	1	2.22e-15	1
AFLA_010990	2.22e-15	1	2.22e-15	1
AFLA_011000	-1.74089	8.97e-06	-1.74089	8.97e-06
AFLA_011010	0.321247	1	0.396482	1
AFLA_011020	2.22e-15	1	2.22e-15	1
AFLA_011030	1.90857	0.386414	2.66e-15	1
AFLA_011040	2.22e-15	1	2.22e-15	1
AFLA_011050	2.22e-15	1	2.22e-15	1
AFLA_011060	2.66e-15	1	2.22e-15	1
AFLA_011070	0.933976	1	2.22e-15	1
AFLA_011080	0.683345	1	1.19133	0.743904
AFLA_011090	0.685342	1	0.385521	1
AFLA_011100	-0.123392	1	0.126675	1
AFLA_011110	2.22e-15	1	2.22e-15	1
AFLA_011120	2.22e-15	1	2.22e-15	1
AFLA_011130	-0.66503	5.89e-05	-0.66503	5.81e-05
AFLA_011140	2.22e-15	1	2.22e-15	1
AFLA_011150	2.22e-15	1	2.22e-15	1
AFLA_011160	2.22e-15	1	2.22e-15	1
AFLA_011170	0.263881	1	0.9774	1
AFLA_011180	2.22e-15	1	2.22e-15	1
AFLA_011190	2.22e-15	1	2.22e-15	1
AFLA_011200	2.22e-15	1	1.82416	1
AFLA_011210	2.26924	0.647206	0.642941	1
AFLA_011220	2.22e-15	1	0.642941	1
AFLA_011230	-0.527183	1	-0.595477	1
AFLA_011240	0.34245	1	0.629092	1
AFLA_011250	2.22e-15	1	2.22e-15	1
AFLA_011260	2.22e-15	1	0.300989	1
AFLA_011270	2.22e-15	1	2.22e-15	1
AFLA_011280	-0.141285	1	-0.21874	1
AFLA_011290	1.74734	0.26478	2.22e-15	1
AFLA_011300	-0.518001	1	-0.230603	1
AFLA_011310	2.22e-15	1	2.22e-15	1
AFLA_011320	2.22e-15	1	2.22e-15	1
AFLA_011330	-1.74089	1	-0.47356	1
AFLA_011340	0.456662	1	2.22e-15	1
AFLA_011350	0.456662	1	2.22e-15	1
AFLA_011360	2.22e-15	1	0.485013	1
AFLA_011370	2.22e-15	1	2.22e-15	1
AFLA_011380	2.22e-15	1	1.16122	1
AFLA_011390	2.22e-15	1	2.22e-15	1
AFLA_011400	2.66e-15	1	2.22e-15	1
AFLA_011410	2.22e-15	1	2.22e-15	1
AFLA_011420	2.22e-15	1	2.22e-15	1
AFLA_011430	2.22e-15	1	2.22e-15	1
AFLA_011440	0.332207	1	2.22e-15	1
AFLA_011450	2.22e-15	1	2.22e-15	1
AFLA_011460	2.22e-15	1	2.22e-15	1
AFLA_011470	-1.33177	1	-0.979979	1
AFLA_011480	-1.17006	1	-1.49289	1
AFLA_011490	1.2624	1	2.08019	0.800679
AFLA_011500	2.22e-15	1	1.37162	1
AFLA_011510	2.22e-15	1	2.22e-15	1
AFLA_011520	2.22e-15	1	2.22e-15	1
AFLA_011530	-0.66503	0.797216	-0.382506	1
AFLA_011540	2.22e-15	1	0.88217	1
AFLA_011550	0.456662	1	2.22e-15	1
AFLA_011560	2.22e-15	1	2.22e-15	1
AFLA_011570	0.175737	1	-1.11543	0.780436
AFLA_011580	0.596088	1	0.795248	0.962411
AFLA_011590	1.09783	0.504613	0.347568	1
AFLA_011600	0.332207	1	0.282524	1
AFLA_011610	1.01546	0.936802	0.512724	1
AFLA_011620	0.822678	1	0.282524	1
AFLA_011630	-1.10596	1	-0.391774	1
AFLA_011640	-0.606659	1	-0.816559	1
AFLA_011650	1.36221	1	1.41107	1
AFLA_011660	0.558798	1	2.22e-15	1
AFLA_011670	2.22e-15	1	2.22e-15	1
AFLA_011680	2.22e-15	1	2.22e-15	1
AFLA_011690	0.677491	1	-0.954794	1
AFLA_011700	-2.1919	0.734314	-1.4654	1
AFLA_011710	2.22e-15	1	2.22e-15	1
AFLA_011720	2.22e-15	1	0.512724	1
AFLA_011730	-1.26996	0.954596	-0.321884	1
AFLA_011740	-1.70992	0.37149	-1.69127	0.41687
AFLA_011750	0.231878	1	1.78042	1
AFLA_011760	2.22e-15	1	2.22e-15	1
AFLA_011770	2.22e-15	1	2.22e-15	1
AFLA_011780	2.22e-15	1	2.22e-15	1
AFLA_011790	-0.423755	1	0.319385	1
AFLA_011800	0.905706	1	0.57572	1
AFLA_011810	-1.79765	0.863254	-0.963961	1
AFLA_011820	2.66e-15	1	2.22e-15	1
AFLA_011830	2.22e-15	1	2.22e-15	1
AFLA_011840	2.22e-15	1	2.22e-15	1
AFLA_011850	2.22e-15	1	2.22e-15	1
AFLA_011860	0.456662	1	2.22e-15	1
AFLA_011870	2.22e-15	1	2.22e-15	1
AFLA_011880	2.22e-15	1	1.019	1
AFLA_011890	-0.509857	1	0.705663	1
AFLA_011900	0.42466	1	0.288305	1
AFLA_011910	2.22e-15	1	2.22e-15	1
AFLA_011920	0.175909	1	-0.66503	1
AFLA_011930	2.22e-15	1	2.22e-15	1
AFLA_011940	1.49277	1	1.06151	1
AFLA_011950	-0.190761	1	-0.616438	1
AFLA_011960	0.263881	1	2.22e-15	1
AFLA_011970	-0.401149	1	-0.66503	1
AFLA_011980	2.22e-15	1	1.10466	1
AFLA_011990	2.22e-15	1	0.9774	1
AFLA_012000	1.82059	1	0.95873	1
AFLA_012010	1.21457	1	0.108811	1
AFLA_012020	2.79742	0.465169	2.34367	0.651178
AFLA_012030	0.0978578	1	-1.21927	1
AFLA_012040	2.22e-15	1	2.22e-15	1
AFLA_012050	2.22e-15	1	2.22e-15	1
AFLA_012060	4.08921	0.108364	1.15567	0.923987
AFLA_012070	0.596088	1	2.22e-15	1
AFLA_012080	0.734099	1	2.22e-15	1
AFLA_012090	0.940182	1	0.2764	1
AFLA_012100	-1.85344	0.778217	-0.226439	1
AFLA_012110	-1.72752	0.573426	0.0679997	1
AFLA_012120	2.22e-15	1	0.282524	1
AFLA_012130	0.112804	1	0.394947	1
AFLA_012140	1.99661	0.804992	0.997736	1
AFLA_012150	0.263881	1	2.22e-15	1
AFLA_012160	0.98879	1	0.561807	1
AFLA_012170	0.137791	1	0.482619	1
AFLA_012180	-1.01753	1	-1.72111	1
AFLA_012190	-2.54824	0.770714	-1.71975	1
AFLA_012200	0.137912	1	0.0135641	1
AFLA_012210	0.0606235	1	-1.39098	1
AFLA_012220	-0.31391	1	-0.32461	1
AFLA_012230	-0.130721	1	-0.184462	1
AFLA_012240	0.456662	1	0.786001	1
AFLA_012250	1.16438	1	-0.384041	1
AFLA_012260	2.22e-15	1	2.22e-15	1
AFLA_012270	1.1071	0.825991	1.7542	0.571703
AFLA_012370	-0.125791	1	-0.335244	1
AFLA_012380	1.03617	0.86808	0.863261	1
AFLA_012390	2.22e-15	1	1.07342	0.918306
AFLA_012400	1.01546	0.763887	0.95873	0.888188
AFLA_012410	0.332207	1	0.772428	1
AFLA_012420	-1.89361	0.693492	-1.25835	1
AFLA_012430	1.24028	0.541254	0.614498	1
AFLA_012440	2.22e-15	1	2.22e-15	1
AFLA_012450	1.8453	0.796137	0.774869	1
AFLA_012460	0.716293	1	0.882121	1
AFLA_012860	2.22e-15	1	2.22e-15	1
AFLA_012870	1.54315	0.779742	2.22e-15	1
AFLA_012880	2.22e-15	1	2.22e-15	1
AFLA_012890	0.608637	1	1.019	1
AFLA_012900	2.22e-15	1	2.22e-15	1
AFLA_012910	2.22e-15	1	2.22e-15	1
AFLA_012920	2.22e-15	1	2.22e-15	1
AFLA_012930	2.22e-15	1	2.22e-15	1
AFLA_012940	2.22e-15	1	2.22e-15	1
AFLA_012950	-0.277554	1	0.40665	1
AFLA_012960	1.1732	1	0.96063	1
AFLA_012970	2.22e-15	1	0.94393	0.780436
AFLA_012980	0.650902	1	-0.860535	1
AFLA_012990	2.22e-15	1	1.20503	1
AFLA_013000	2.22e-15	1	2.22e-15	1
AFLA_013010	2.22e-15	1	2.22e-15	1
AFLA_013020	2.22e-15	1	2.22e-15	1
AFLA_013030	2.22e-15	1	2.22e-15	1
AFLA_013040	2.00265	0.873139	0.94393	1
AFLA_013050	-1.90077	0.800407	-2.10961	0.832517
AFLA_013060	2.22e-15	1	2.22e-15	1
AFLA_013070	2.22e-15	1	2.22e-15	1
AFLA_013080	1.01637	1	1.07342	1
AFLA_013090	0.608637	1	1.13683	1
AFLA_013100	2.22e-15	1	2.22e-15	1
AFLA_013110	0.608637	1	2.22e-15	1
AFLA_013120	0.730967	1	2.22e-15	1
AFLA_013130	2.22e-15	1	2.22e-15	1
AFLA_013140	2.22e-15	1	2.22e-15	1
AFLA_013150	2.22e-15	1	2.22e-15	1
AFLA_013160	2.24847	0.961982	-0.236324	1
AFLA_013170	2.22e-15	1	2.22e-15	1
AFLA_013180	2.22e-15	1	2.22e-15	1
AFLA_013190	0.734099	1	0.583513	1
AFLA_013200	0.291788	1	0.212238	1
AFLA_013210	2.22e-15	1	2.22e-15	1
AFLA_013220	2.22e-15	1	2.22e-15	1
AFLA_013230	2.22e-15	1	2.22e-15	1
AFLA_013240	2.22e-15	1	2.22e-15	1
AFLA_013250	2.22e-15	1	2.22e-15	1
AFLA_013260	2.22e-15	1	2.22e-15	1
AFLA_013270	2.22e-15	1	2.22e-15	1
AFLA_013280	0.986277	1	2.22e-15	1
AFLA_013290	2.22e-15	1	0.772428	1
AFLA_013300	-0.578728	1	-1.81426	1
AFLA_013310	2.22e-15	1	2.22e-15	1
AFLA_013320	2.22e-15	1	2.22e-15	1
AFLA_013330	1.64911	1	1.20431	1
AFLA_013340	2.22e-15	1	2.22e-15	1
AFLA_013350	0.278083	1	-0.262239	1
AFLA_013360	-0.208368	1	0.636497	1
AFLA_013370	0.734099	1	2.22e-15	1
AFLA_013380	2.22e-15	1	2.22e-15	1
AFLA_013390	2.22e-15	1	2.22e-15	1
AFLA_013400	2.22e-15	1	0.88217	1
AFLA_013410	2.22e-15	1	2.22e-15	1
AFLA_013420	2.22e-15	1	2.22e-15	1
AFLA_013430	2.66e-15	1	2.45545	0.326773
AFLA_013440	1.55659	0.363145	1.36092	0.494862
AFLA_013450	2.22e-15	1	2.22e-15	1
AFLA_013460	2.22e-15	1	2.22e-15	1
AFLA_013470	-1.59332	1	0.189622	1
AFLA_013480	1.6026	0.305941	0.0775627	1
AFLA_013490	2.22e-15	1	2.22e-15	1
AFLA_013500	2.22e-15	1	2.22e-15	1
AFLA_013510	2.22e-15	1	2.22e-15	1
AFLA_013520	2.73356	0.224019	2.32827	0.335802
AFLA_013530	0.608637	1	2.22e-15	1
AFLA_013540	0.332207	1	2.22e-15	1
AFLA_013550	-1.24853	0.522713	-0.704133	1
AFLA_013560	0.289936	1	0.317986	1
AFLA_013570	2.22e-15	1	2.22e-15	1
AFLA_013580	2.22e-15	1	2.22e-15	1
AFLA_013590	0.332207	1	2.22e-15	1
AFLA_013600	2.22e-15	1	2.22e-15	1
AFLA_013610	-0.66503	0.828358	-0.364041	1
AFLA_013620	2.22e-15	1	2.22e-15	1
AFLA_013630	2.22e-15	1	0.282524	1
AFLA_013640	2.22e-15	1	2.22e-15	1
AFLA_013650	2.22e-15	1	2.22e-15	1
AFLA_013660	-0.212838	1	-0.950273	1
AFLA_013670	2.22e-15	1	0.512724	1
AFLA_013680	2.22e-15	1	2.22e-15	1
AFLA_013690	-0.302539	1	0.242412	1
AFLA_013700	2.22e-15	1	2.22e-15	1
AFLA_013710	2.22e-15	1	2.22e-15	1
AFLA_013720	-0.665351	1	-0.336726	1
AFLA_013730	0.485314	1	0.0437473	1
AFLA_013740	2.22e-15	1	2.22e-15	1
AFLA_013750	2.22e-15	1	2.22e-15	1
AFLA_013760	2.22e-15	1	2.22e-15	1
AFLA_013770	2.22e-15	1	2.22e-15	1
AFLA_013780	2.22e-15	1	2.22e-15	1
AFLA_013790	2.22e-15	1	2.22e-15	1
AFLA_013800	1.34858	0.952458	1.45234	0.986504
AFLA_013810	0.608637	1	0.676206	1
AFLA_013820	2.22e-15	1	2.22e-15	1
AFLA_013830	2.22e-15	1	2.22e-15	1
AFLA_013840	2.22e-15	1	2.22e-15	1
AFLA_013850	2.22e-15	1	2.22e-15	1
AFLA_013860	0.608637	1	2.22e-15	1
AFLA_013870	2.22e-15	1	0.485013	1
AFLA_013880	2.22e-15	1	2.22e-15	1
AFLA_013890	0.286352	1	0.758636	1
AFLA_013900	-0.411322	0.805414	-0.955674	0.285274
AFLA_013910	2.22e-15	1	2.22e-15	1
AFLA_013920	2.22e-15	1	2.22e-15	1
AFLA_013930	2.22e-15	1	0.642941	1
AFLA_013940	2.22e-15	1	2.22e-15	1
AFLA_013950	2.22e-15	1	2.51859	0.834442
AFLA_013960	2.22e-15	1	2.22e-15	1
AFLA_013970	-1.2842	0.573426	-0.465657	1
AFLA_013980	2.22e-15	1	2.22e-15	1
AFLA_013990	0.647262	1	-0.697457	1
AFLA_014000	2.22e-15	1	2.22e-15	1
AFLA_014010	1.02183	1	-1.73468	1
AFLA_014020	2.22e-15	1	2.22e-15	1
AFLA_014030	2.22e-15	1	2.22e-15	1
AFLA_014040	0.263881	1	2.22e-15	1
AFLA_014050	2.22e-15	1	2.22e-15	1
AFLA_014060	2.22e-15	1	2.22e-15	1
AFLA_014070	2.22e-15	1	2.22e-15	1
AFLA_014080	2.22e-15	1	2.22e-15	1
AFLA_014090	2.22e-15	1	2.22e-15	1
AFLA_014100	-0.0348999	1	0.269191	1
AFLA_014110	2.54955	1	1.01142	1
AFLA_014120	2.22e-15	1	0.642941	1
AFLA_014130	2.22e-15	1	2.22e-15	1
AFLA_014140	2.22e-15	1	2.22e-15	1
AFLA_014150	2.22e-15	1	0.282524	1
AFLA_014160	0.332207	1	2.22e-15	1
AFLA_014170	2.22e-15	1	2.22e-15	1
AFLA_014180	2.22e-15	1	2.22e-15	1
AFLA_014190	2.22e-15	1	2.22e-15	1
AFLA_014200	1.81593	0.24167	-0.382506	1
AFLA_014210	2.22e-15	1	2.22e-15	1
AFLA_014220	-1.54022	1	-1.80956	1
AFLA_014230	1.04618	1	-0.732559	1
AFLA_014240	1.28143	1	-0.103869	1
AFLA_014250	1.71097	1	1.4068	1
AFLA_014260	2.22e-15	1	2.22e-15	1
AFLA_014270	2.22e-15	1	0.282524	1
AFLA_014280	2.9194	0.906279	2.35559	1
AFLA_014290	2.22e-15	1	0.282524	1
AFLA_014300	0.558798	1	1.20503	1
AFLA_014310	0.596088	0.88684	0.282524	1
AFLA_014320	2.22e-15	1	2.22e-15	1
AFLA_014330	2.08931	0.712311	2.28389	0.744307
AFLA_014340	2.22e-15	1	2.22e-15	1
AFLA_014350	1.30883	0.595595	0.706158	1
AFLA_014360	-0.854613	1	-0.60577	1
AFLA_014370	1.47378	0.0775689	0.736868	0.359796
AFLA_014380	1.39207	0.862292	0.805783	1
AFLA_014390	-0.177649	1	-0.056982	1
AFLA_014400	0.456662	1	0.809397	1
AFLA_014410	2.22e-15	1	2.22e-15	1
AFLA_014420	1.01637	1	0.921786	1
AFLA_014430	2.22e-15	1	0.282524	1
AFLA_014440	-0.288897	1	-0.573173	1
AFLA_014450	2.22e-15	1	2.22e-15	1
AFLA_014460	2.22e-15	1	2.22e-15	1
AFLA_014470	3.71369	0.998205	2.27263	1
AFLA_014480	-0.560797	1	-3.05908	0.5817
AFLA_014490	0.263881	1	3.17759	0.76263
AFLA_014500	2.22e-15	1	0.772428	1
AFLA_014510	2.22e-15	1	2.22e-15	1
AFLA_014520	1.91341	1	1.64466	1
AFLA_014530	-1.66617	1	0.6189	1
AFLA_014540	2.22e-15	1	2.22e-15	1
AFLA_014550	2.22e-15	1	2.22e-15	1
AFLA_014560	-1.6331	0.808273	-0.521747	1
AFLA_014570	0.148275	1	-0.160759	1
AFLA_014580	-1.37953	1	-1.61968	1
AFLA_014590	2.22e-15	1	2.22e-15	1
AFLA_014600	0.263881	1	2.22e-15	1
AFLA_014610	0.456662	1	0.809397	1
AFLA_014620	2.22e-15	1	2.22e-15	1
AFLA_014630	-0.946401	1	-0.882343	1
AFLA_014640	0.558798	1	0.300989	1
AFLA_014650	0.456662	1	0.88217	1
AFLA_014660	0.558798	1	2.66e-15	1
AFLA_014670	-0.622058	1	-0.653599	1
AFLA_014680	0.547994	1	1.16565	0.76477
AFLA_014690	2.22e-15	1	0.300989	1
AFLA_014700	0.193053	1	0.628756	1
AFLA_014710	0.321247	1	0.011176	1
AFLA_014720	0.456662	1	1.39489	1
AFLA_014730	-1.13225	1	-1.25587	1
AFLA_014740	1.43835	1	2.22e-15	1
AFLA_014750	-2.69434	0.33115	-1.3442	0.888188
AFLA_014760	0.933976	1	2.41355	1
AFLA_014770	0.0220889	1	-0.584609	1
AFLA_014780	1.3396	1	1.82416	1
AFLA_014790	-3.52867	0.603334	-3.01595	0.806447
AFLA_014800	2.22e-15	1	2.22e-15	1
AFLA_014810	0.587839	1	0.130218	1
AFLA_014820	2.22e-15	1	2.22e-15	1
AFLA_014830	-0.361057	1	-0.533302	1
AFLA_014840	2.22e-15	1	0.642941	1
AFLA_014850	-2.50711	0.211511	-0.560883	1
AFLA_014860	2.22e-15	1	0.282524	1
AFLA_014870	2.22e-15	1	2.22e-15	1
AFLA_014880	2.22e-15	1	2.22e-15	1
AFLA_014890	-0.103208	1	-0.956993	1
AFLA_014900	2.22e-15	1	0.921786	1
AFLA_014910	0.777207	1	-0.648965	1
AFLA_014920	-0.539778	1	0.105355	1
AFLA_014930	0.940845	0.654197	0.786001	0.885482
AFLA_014940	-1.84355	0.4434	-1.83474	0.494293
AFLA_014950	0.705574	1	0.0233261	1
AFLA_014960	1.71618	0.781217	2.18911	0.685335
AFLA_014970	-0.0286051	1	0.181905	1
AFLA_014980	-0.556936	1	-0.0675514	1
AFLA_014990	0.263881	1	0.95873	1
AFLA_015000	2.22e-15	1	2.22e-15	1
AFLA_015010	2.22e-15	1	2.22e-15	1
AFLA_015020	-0.661832	1	-1.11849	1
AFLA_015030	2.22e-15	1	0.282524	1
AFLA_015040	-2.35027	0.532006	-1.67407	0.854401
AFLA_015050	1.35037	1	0.300989	1
AFLA_015060	0.77368	0.94369	-0.329722	1
AFLA_015070	-0.546446	1	-0.685751	1
AFLA_015080	2.22e-15	1	2.22e-15	1
AFLA_015090	1.15738	1	0.282524	1
AFLA_015100	2.22e-15	1	2.22e-15	1
AFLA_015110	0.940845	1	1.26733	1
AFLA_015120	2.22e-15	1	2.22e-15	1
AFLA_015130	2.22e-15	1	0.300989	1
AFLA_015140	-0.66503	0.797216	-0.66503	0.894712
AFLA_015150	2.22e-15	1	2.22e-15	1
AFLA_015160	2.22e-15	1	2.22e-15	1
AFLA_015170	1.01637	1	2.22e-15	1
AFLA_015180	2.22e-15	1	0.485013	1
AFLA_015190	2.22e-15	1	2.22e-15	1
AFLA_015200	0.456662	1	0.300989	1
AFLA_015210	2.22e-15	1	2.22e-15	1
AFLA_015220	-1.00992	1	-0.954885	1
AFLA_015230	2.22e-15	1	0.512724	1
AFLA_015240	-1.71762	0.865939	-0.895892	1
AFLA_015250	-1.55554	1	-1.7193	1
AFLA_015260	2.22e-15	1	2.22e-15	1
AFLA_015270	2.22e-15	1	0.300989	1
AFLA_015280	1.31812	0.734314	0.657459	1
AFLA_015290	2.22e-15	1	0.676206	1
AFLA_015300	-1.60916	0.989984	-0.523125	1
AFLA_015310	-0.0654696	1	-1.34204	1
AFLA_015320	0.263881	1	0.485013	1
AFLA_015330	0.868461	0.595853	-0.32235	1
AFLA_015340	0.151665	1	0.287552	1
AFLA_015350	-1.64159	1	-1.09163	1
AFLA_015360	1.28467	1	0.620122	1
AFLA_015370	2.25756	0.337709	0.282524	1
AFLA_015380	-0.964042	0.572811	0.521068	1
AFLA_015390	-0.734422	1	-0.561182	1
AFLA_015400	-0.509857	1	-0.0450775	1
AFLA_015410	0.822678	1	0.282524	1
AFLA_015420	0.608637	1	2.22e-15	1
AFLA_015430	-1.74089	1	-1.25587	1
AFLA_015440	2.22e-15	1	2.22e-15	1
AFLA_015450	-2.04401	1	-2.61787	1
AFLA_015460	1.06631	0.884694	1.94623	0.527888
AFLA_015470	0.312808	1	-1.46107	1
AFLA_015480	0.79594	1	0.269594	1
AFLA_015490	-2.16152	1	-1.75878	1
AFLA_015500	2.22e-15	1	2.22e-15	1
AFLA_015510	0.734099	1	2.22e-15	1
AFLA_015520	2.22e-15	1	2.22e-15	1
AFLA_015530	0.332207	1	2.22e-15	1
AFLA_015540	-0.661832	1	0.668303	1
AFLA_015550	0.994848	1	0.300989	1
AFLA_015560	2.22e-15	1	0.300989	1
AFLA_015570	2.22e-15	1	2.22e-15	1
AFLA_015580	-0.593137	1	-0.0681023	1
AFLA_015590	-0.153813	1	1.5124	1
AFLA_015600	-1.74787	0.326042	-2.38297	0.190753
AFLA_015610	2.60857	0.716513	1.79977	1
AFLA_015620	2.22e-15	1	2.22e-15	1
AFLA_015630	2.22e-15	1	2.22e-15	1
AFLA_015640	0.263881	1	2.22e-15	1
AFLA_015650	2.22e-15	1	2.22e-15	1
AFLA_015660	2.22e-15	1	2.22e-15	1
AFLA_015670	2.22e-15	1	2.22e-15	1
AFLA_015680	2.22e-15	1	2.22e-15	1
AFLA_015690	2.22e-15	1	2.22e-15	1
AFLA_015700	0.743013	1	0.037171	1
AFLA_015710	1.69513	0.906279	0.300989	1
AFLA_015720	2.22e-15	1	0.512724	1
AFLA_015730	0.0564781	1	-0.794071	1
AFLA_015740	1.18763	1	1.26733	1
AFLA_015750	2.22e-15	1	2.22e-15	1
AFLA_015760	2.66e-15	1	0.642941	1
AFLA_015770	2.22e-15	1	0.282524	1
AFLA_015780	2.22e-15	1	2.22e-15	1
AFLA_015790	-1.85486	1	-2.2144	1
AFLA_015800	2.22e-15	1	2.22e-15	1
AFLA_015810	2.22e-15	1	2.22e-15	1
AFLA_015820	2.22e-15	1	2.22e-15	1
AFLA_015830	2.22e-15	1	2.22e-15	1
AFLA_015840	0.332207	1	0.512724	1
AFLA_015850	-0.547687	1	-1.28433	1
AFLA_015860	2.22e-15	1	0.300989	1
AFLA_015870	2.22e-15	1	2.22e-15	1
AFLA_015880	2.22e-15	1	2.22e-15	1
AFLA_015890	2.22e-15	1	2.22e-15	1
AFLA_015900	2.22e-15	1	2.22e-15	1
AFLA_015910	0.608637	1	2.22e-15	1
AFLA_015920	0.608637	1	1.56831	1
AFLA_015930	2.22e-15	1	2.22e-15	1
AFLA_015940	2.22e-15	1	2.22e-15	1
AFLA_015950	2.22e-15	1	2.22e-15	1
AFLA_015960	0.734099	1	1.45234	1
AFLA_015970	2.22e-15	1	2.22e-15	1
AFLA_015980	2.22e-15	1	2.22e-15	1
AFLA_015990	2.22e-15	1	2.22e-15	1
AFLA_016000	2.52846	0.346706	-0.66503	1
AFLA_016010	0.235968	0.789516	-1.59077	0.0146343
AFLA_016020	2.22e-15	1	2.22e-15	1
AFLA_016030	2.22e-15	1	0.512724	1
AFLA_016040	2.22e-15	1	2.22e-15	1
AFLA_016050	2.22e-15	1	2.22e-15	1
AFLA_016060	0.263881	1	2.22e-15	1
AFLA_016070	2.22e-15	1	2.22e-15	1
AFLA_016080	2.22e-15	1	2.22e-15	1
AFLA_016090	0.456662	1	0.512724	1
AFLA_016100	2.22e-15	1	2.22e-15	1
AFLA_016110	2.22e-15	1	2.22e-15	1
AFLA_016120	2.22e-15	1	2.22e-15	1
AFLA_016130	2.22e-15	1	2.22e-15	1
AFLA_016140	0.332207	1	2.22e-15	1
AFLA_016150	0.596088	1	1.20503	1
AFLA_016160	2.22e-15	1	2.22e-15	1
AFLA_016170	1.32358	1	1.70788	1
AFLA_016180	-2.08639	0.255114	-2.35027	0.218504
AFLA_016190	2.22e-15	1	2.22e-15	1
AFLA_016200	0.263881	1	2.22e-15	1
AFLA_016210	2.22e-15	1	0.300989	1
AFLA_016220	2.22e-15	1	2.22e-15	1
AFLA_016230	2.22e-15	1	2.22e-15	1
AFLA_016240	2.22e-15	1	2.22e-15	1
AFLA_016250	-2.64856	6.51e-06	-2.64856	6.51e-06
AFLA_016260	2.22e-15	1	0.772428	1
AFLA_016270	2.22e-15	1	2.22e-15	1
AFLA_016280	2.22e-15	1	2.22e-15	1
AFLA_016290	2.66e-15	1	2.22e-15	1
AFLA_016300	0.790072	1	-0.141094	1
AFLA_016310	2.22e-15	1	2.22e-15	1
AFLA_016320	2.52815	0.623917	0.786001	1
AFLA_016330	0.263881	1	2.22e-15	1
AFLA_016340	1.3183	1	0.619063	1
AFLA_016350	2.22e-15	1	2.22e-15	1
AFLA_016360	2.22e-15	1	2.22e-15	1
AFLA_016370	0.263881	1	2.22e-15	1
AFLA_016380	2.22e-15	1	0.997736	0.5817
AFLA_016390	2.22e-15	1	2.22e-15	1
AFLA_016400	2.22e-15	1	2.22e-15	1
AFLA_016410	2.22e-15	1	2.22e-15	1
AFLA_016420	-0.66503	0.797216	-0.66503	0.894712
AFLA_016430	0.608637	1	0.676206	1
AFLA_016440	0.263881	1	2.22e-15	1
AFLA_016450	2.22e-15	1	0.642941	1
AFLA_016460	2.22e-15	1	2.22e-15	1
AFLA_016470	2.22e-15	1	2.22e-15	1
AFLA_016480	2.22e-15	1	2.22e-15	1
AFLA_016490	2.22e-15	1	2.22e-15	1
AFLA_016500	2.22e-15	1	2.22e-15	1
AFLA_016510	1.56388	1	1.73176	1
AFLA_016520	2.22e-15	1	2.22e-15	1
AFLA_016530	2.22e-15	1	0.583513	0.00216127
AFLA_016540	0.263881	1	2.13407	0.998392
AFLA_016550	-0.728897	1	-0.54121	1
AFLA_016560	0.332207	1	2.22e-15	1
AFLA_016570	-0.66503	1	-0.66503	1
AFLA_016580	-2.17428	0.575434	-1.49807	0.942308
AFLA_016590	2.22e-15	1	2.22e-15	1
AFLA_016600	-0.401149	1	0.2937	1
AFLA_016610	1.84464	0.920822	2.66e-15	1
AFLA_016620	-0.927017	1	-0.115788	1
AFLA_016630	-0.401149	1	-0.0220885	1
AFLA_016640	1.44294	0.796137	0.300989	1
AFLA_016650	-0.208368	1	0.120971	1
AFLA_016660	2.22e-15	1	2.22e-15	1
AFLA_016670	2.22e-15	1	2.22e-15	1
AFLA_016680	0.492349	1	-0.364041	1
AFLA_016690	1.66494	0.475919	0.282524	1
AFLA_016700	0.526694	1	0.38997	1
AFLA_016710	0.456662	1	0.512724	1
AFLA_016720	0.661492	1	1.05399	1
AFLA_016730	2.4357	0.952458	1.31915	1
AFLA_016740	-1.11849	0.803844	-0.633482	1
AFLA_016750	-0.384395	1	0.2764	1
AFLA_016760	0.785255	1	0.0427243	1
AFLA_016770	2.22e-15	1	2.22e-15	1
AFLA_016780	0.263881	1	2.22e-15	1
AFLA_016790	2.17681	0.957891	0.282524	1
AFLA_016800	0.456662	1	1.10466	1
AFLA_016810	2.22e-15	1	0.282524	1
AFLA_016820	2.22e-15	1	2.22e-15	1
AFLA_016830	-0.674127	1	0.000743707	1
AFLA_016840	-1.62948	1	-2.31922	0.861048
AFLA_016850	0.456662	1	0.95873	1
AFLA_016860	-0.72383	1	-0.590451	1
AFLA_016870	-3.41675	0.808273	0.592935	1
AFLA_016880	-1.58873	0.808738	-0.731416	1
AFLA_016890	2.22e-15	1	0.300989	1
AFLA_016900	2.22e-15	1	2.22e-15	1
AFLA_016910	2.22e-15	1	2.22e-15	1
AFLA_016920	-0.98752	1	-0.521459	1
AFLA_016930	1.15738	1	1.09192	1
AFLA_016940	-1.32883	1	-2.55851	1
AFLA_016950	0.840939	1	2.22e-15	1
AFLA_016960	-0.208368	1	0.903285	1
AFLA_016970	-2.77737	0.668674	-0.432357	1
AFLA_016980	2.22e-15	1	1.20431	1
AFLA_016990	-0.66503	0.828358	-0.364041	1
AFLA_017000	-0.572987	1	-0.778476	1
AFLA_017010	0.558798	1	2.22e-15	1
AFLA_017020	2.22e-15	1	2.22e-15	1
AFLA_017030	-1.28422	0.820381	-0.954885	1
AFLA_017040	-1.10476	1	-2.84153	1
AFLA_017050	2.22e-15	1	0.88217	1
AFLA_017060	2.22e-15	1	2.22e-15	1
AFLA_017070	-1.11849	0.409652	-1.11849	0.443994
AFLA_017080	0.608637	1	0.772428	1
AFLA_017090	1.2624	1	1.58143	1
AFLA_017100	0.456662	1	0.676206	1
AFLA_017110	0.35043	1	-0.66503	1
AFLA_017120	2.22e-15	1	2.22e-15	1
AFLA_017130	-0.0689419	1	0.408387	1
AFLA_017140	0.263881	1	0.485013	1
AFLA_017150	0.332207	1	0.512724	1
AFLA_017160	2.22e-15	1	2.22e-15	1
AFLA_017170	2.22e-15	1	2.22e-15	1
AFLA_017180	0.332207	1	0.512724	1
AFLA_017190	2.22e-15	1	0.282524	1
AFLA_017200	-0.150081	1	-1.37903	1
AFLA_017210	1.25016	1	2.22e-15	1
AFLA_017220	-0.0562266	1	-0.342573	1
AFLA_017230	2.22e-15	1	2.22e-15	1
AFLA_017240	-0.184518	1	-0.442288	1
AFLA_017250	2.2141	0.789516	1.15903	1
AFLA_017260	0.263881	1	2.22e-15	1
AFLA_017270	0.263881	1	2.22e-15	1
AFLA_017280	0.263881	1	0.282524	1
AFLA_017290	1.08649	1	2.50589	1
AFLA_017300	2.22e-15	1	2.22e-15	1
AFLA_017310	2.22e-15	1	2.22e-15	1
AFLA_017320	2.22e-15	1	2.22e-15	1
AFLA_017330	0.840939	1	0.512724	1
AFLA_017340	0.263881	1	2.22e-15	1
AFLA_017350	2.22e-15	1	0.300989	1
AFLA_017360	0.692024	1	0.569639	1
AFLA_017370	-0.352301	1	0.434015	1
AFLA_017380	-0.984431	0.208137	-1.20094	0.145485
AFLA_017390	-1.36065	1	-0.615806	1
AFLA_017400	3.44394	0.301219	1.1121	1
AFLA_017410	-0.697927	1	-0.0631432	1
AFLA_017420	2.22e-15	1	2.22e-15	1
AFLA_017430	2.22e-15	1	0.300989	1
AFLA_017440	0.420636	1	0.379307	1
AFLA_017450	-1.9738	0.14931	-1.69127	0.224447
AFLA_017460	-2.28397	1	-2.60186	1
AFLA_017470	2.22e-15	1	2.22e-15	1
AFLA_017480	0.456662	1	0.300989	1
AFLA_017490	2.22e-15	1	2.22e-15	1
AFLA_017500	0.117459	1	-0.998099	1
AFLA_017510	-0.6809	1	-0.498438	1
AFLA_017520	0.456662	1	2.22e-15	1
AFLA_017530	-2.35027	1	-0.923007	1
AFLA_017540	0.351344	1	0.620122	1
AFLA_017550	2.22e-15	1	1.09192	0.998392
AFLA_017560	2.22e-15	1	2.22e-15	1
AFLA_017570	0.536785	1	0.331066	1
AFLA_017580	1.63113	1	0.282524	1
AFLA_017590	0.351614	1	-0.291186	1
AFLA_017600	-0.134536	1	-1.04352	1
AFLA_017610	2.22e-15	1	2.22e-15	1
AFLA_017620	2.22e-15	1	2.22e-15	1
AFLA_017630	-0.640318	1	0.220711	1
AFLA_017640	1.95838	1	1.13683	1
AFLA_017650	0.840939	1	2.74941	0.825005
AFLA_017660	2.22e-15	1	2.22e-15	1
AFLA_017670	-1.25695	1	-0.260655	1
AFLA_017680	-2.28698	0.778217	-2.61309	0.771788
AFLA_017690	-0.926671	1	-1.73724	0.834442
AFLA_017700	-0.880904	1	-1.22626	1
AFLA_017710	0.78887	1	0.583513	1
AFLA_017720	0.557472	0.515191	-0.143849	1
AFLA_017730	-1.28838	1	-1.56318	1
AFLA_017740	0.910141	1	0.426891	1
AFLA_017750	2.05868	1	0.583513	1
AFLA_017760	-0.412383	1	-0.298832	1
AFLA_017770	-0.305755	1	0.0673489	1
AFLA_017780	2.22e-15	1	0.300989	1
AFLA_017790	2.18778	0.399894	2.44012	0.356489
AFLA_017800	-1.05473	1	-1.74345	1
AFLA_017810	-1.61931	0.828358	0.642155	1
AFLA_017820	-1.70992	0.177197	-1.9738	0.134454
AFLA_017830	0.730967	1	2.22e-15	1
AFLA_017840	-0.135453	1	-1.62711	1
AFLA_017850	2.22e-15	1	2.22e-15	1
AFLA_017860	2.98718	0.885209	2.24646	1
AFLA_017870	1.6612	0.966023	1.46478	1
AFLA_017880	1.02091	0.712311	1.08466	0.768686
AFLA_017890	-0.728897	1	0.393639	1
AFLA_017900	-1.17713	0.891154	-0.268213	1
AFLA_017910	-1.11849	0.409652	-1.11849	0.443994
AFLA_017920	0.263881	1	0.300989	1
AFLA_017930	2.22e-15	1	0.300989	1
AFLA_017940	2.22e-15	1	0.485013	1
AFLA_017950	2.22e-15	1	2.22e-15	1
AFLA_017960	-0.401149	1	-0.66503	0.83901
AFLA_017970	1.25016	1	0.485013	1
AFLA_017980	-1.463	0.615203	-0.977984	0.998392
AFLA_017990	2.22e-15	1	0.300989	1
AFLA_018000	1.25554	0.778217	1.37303	0.793764
AFLA_018010	0.263881	1	1.47356	1
AFLA_018020	-0.401149	1	-0.66503	0.83901
AFLA_018030	2.22e-15	1	2.22e-15	1
AFLA_018040	0.263881	1	2.07672	0.493704
AFLA_018050	1.82403	0.684555	1.04768	1
AFLA_018060	0.456662	1	0.300989	1
AFLA_018070	-1.02564	1	-0.980463	1
AFLA_018080	-1.89361	1	-1.09985	1
AFLA_018090	2.22e-15	1	0.300989	1
AFLA_018100	0.596088	0.850082	2.22e-15	1
AFLA_018110	0.69647	0.923374	0.0571608	1
AFLA_018120	1.09032	1	2.22e-15	1
AFLA_018130	2.22e-15	1	2.22e-15	1
AFLA_018140	2.22e-15	1	2.22e-15	1
AFLA_018150	-0.617144	1	-1.43947	1
AFLA_018160	-1.463	1	-0.580826	1
AFLA_018170	0.456662	1	0.282524	1
AFLA_018180	2.22e-15	1	0.9774	1
AFLA_018190	-1.39321	1	-0.295964	1
AFLA_018200	2.22e-15	1	2.22e-15	1
AFLA_018210	2.22e-15	1	2.22e-15	1
AFLA_018220	0.6684	1	-0.495513	1
AFLA_018230	0.263881	1	2.22e-15	1
AFLA_018240	2.22e-15	1	2.22e-15	1
AFLA_018250	1.46208	1	1.2858	1
AFLA_018260	2.22e-15	1	2.22e-15	1
AFLA_018270	0.332207	1	2.22e-15	1
AFLA_018280	2.22e-15	1	0.772428	1
AFLA_018290	-0.494415	1	-0.356245	1
AFLA_018300	2.22e-15	1	2.22e-15	1
AFLA_018310	-1.1794	1	-1.69771	1
AFLA_018320	0.332207	1	0.88217	1
AFLA_018330	2.22e-15	1	2.22e-15	1
AFLA_018340	0.263881	1	2.22e-15	1
AFLA_018350	-0.655297	1	-1.59615	1
AFLA_018360	0.250847	1	0.0652984	1
AFLA_018370	1.72841	1	-0.382506	1
AFLA_018380	0.734099	1	2.22e-15	1
AFLA_018390	2.22e-15	1	0.676206	1
AFLA_018400	-2.17428	0.704649	-1.36488	1
AFLA_018410	2.66e-15	1	3.62828	0.051683
AFLA_018420	2.22e-15	1	2.66e-15	1
AFLA_018430	0.263881	1	0.921786	1
AFLA_018440	1.44709	1	1.15567	1
AFLA_018450	-0.854613	1	0.200653	1
AFLA_018460	0.822678	1	0.88217	1
AFLA_018470	0.100016	1	0.214321	1
AFLA_018480	0.263881	1	2.22e-15	1
AFLA_018490	-1.09788	0.748648	-1.69102	0.496947
AFLA_018500	0.608637	1	0.282524	1
AFLA_018510	1.45039	0.706898	2.57735	0.355047
AFLA_018520	0.608637	1	2.22e-15	1
AFLA_018530	-0.0563924	1	-0.66503	1
AFLA_018540	-1.56564	0.801631	-0.482714	1
AFLA_018550	2.98718	0.691071	1.69157	1
AFLA_018560	-0.854613	1	-0.196708	1
AFLA_018570	2.22e-15	1	2.22e-15	1
AFLA_018580	0.263881	1	2.22e-15	1
AFLA_018590	0.596088	0.875691	1.56473	0.273272
AFLA_018600	-0.66503	5.89e-05	-0.66503	5.81e-05
AFLA_018610	2.22e-15	1	2.22e-15	1
AFLA_018620	0.263881	1	2.22e-15	1
AFLA_018630	0.933976	1	2.22e-15	1
AFLA_018640	0.940845	1	0.88217	1
AFLA_018650	2.22e-15	1	2.22e-15	1
AFLA_018660	0.456662	1	2.22e-15	1
AFLA_018670	1.82722	0.0401803	1.31915	0.0899069
AFLA_018680	0.0661716	1	-1.36537	0.0526474
AFLA_018690	2.22e-15	1	2.22e-15	1
AFLA_018700	0.263881	1	2.43886	0.528885
AFLA_018710	2.22e-15	1	2.22e-15	1
AFLA_018720	1.21873	1	0.300989	1
AFLA_018730	1.51566	0.763973	0.281974	1
AFLA_018740	1.35037	1	1.019	1
AFLA_018750	2.22e-15	1	0.282524	1
AFLA_018760	-1.36495	1	-1.38272	1
AFLA_018770	2.22e-15	1	2.22e-15	1
AFLA_018780	2.22e-15	1	2.22e-15	1
AFLA_018790	1.16219	0.808273	-0.180017	1
AFLA_018800	1.22072	1	-1.39958	1
AFLA_018810	-0.317933	1	0.522188	1
AFLA_018820	2.62945	0.0913428	2.22e-15	1
AFLA_018830	2.22e-15	1	2.22e-15	1
AFLA_018840	2.22e-15	1	2.22e-15	1
AFLA_018850	2.22e-15	1	2.22e-15	1
AFLA_018860	2.67498	1	1.15303	1
AFLA_018870	0.947252	1	0.80963	1
AFLA_018880	-0.401149	1	-0.66503	0.83901
AFLA_018890	-0.401149	1	-0.180017	1
AFLA_018900	0.263881	1	2.22e-15	1
AFLA_018910	-1.46658	0.921768	-0.283706	1
AFLA_018920	2.22e-15	1	2.22e-15	1
AFLA_018930	2.22e-15	1	2.22e-15	1
AFLA_018940	0.116728	1	0.674842	1
AFLA_018950	0.377165	1	-0.120058	1
AFLA_018960	2.22e-15	1	0.300989	1
AFLA_018970	0.596088	0.0870287	2.22e-15	1
AFLA_018980	0.994848	0.859726	2.22e-15	1
AFLA_018990	2.22e-15	1	2.22e-15	1
AFLA_019000	-2.20035	0.486133	-0.538583	1
AFLA_019010	0.730967	1	0.282524	1
AFLA_019020	1.48821	0.850082	0.668303	1
AFLA_019030	2.22e-15	1	1.18316	1
AFLA_019040	2.22e-15	1	2.22e-15	1
AFLA_019050	-1.11849	1	-1.11849	1
AFLA_019060	2.22e-15	1	2.22e-15	1
AFLA_019070	2.22e-15	1	2.22e-15	1
AFLA_019080	-2.51349	0.224019	-0.588257	1
AFLA_019090	0.608637	1	1.9833	1
AFLA_019100	2.22e-15	1	0.9774	1
AFLA_019110	0.351344	1	1.62594	1
AFLA_019120	-1.14631	0.652289	-1.31969	0.633092
AFLA_019130	-0.25342	1	-1.69127	1
AFLA_019140	2.22e-15	1	2.22e-15	1
AFLA_019150	0.456662	1	0.921786	1
AFLA_019160	2.22e-15	1	2.22e-15	1
AFLA_019170	2.22e-15	1	2.22e-15	1
AFLA_019180	2.22e-15	1	2.22e-15	1
AFLA_019190	2.22e-15	1	2.22e-15	1
AFLA_019200	2.22e-15	1	2.22e-15	1
AFLA_019210	2.22e-15	1	2.22e-15	1
AFLA_019220	1.3396	0.0528295	2.22e-15	1
AFLA_019230	2.22e-15	1	2.22e-15	1
AFLA_019240	2.22e-15	1	2.22e-15	1
AFLA_019250	2.22e-15	1	2.22e-15	1
AFLA_019260	0.608637	1	2.22e-15	1
AFLA_019270	-0.706612	1	-0.813227	1
AFLA_019280	-0.277555	1	0.867794	1
AFLA_019290	2.22e-15	1	2.22e-15	1
AFLA_019300	2.22e-15	1	2.22e-15	1
AFLA_019310	2.22e-15	1	2.22e-15	1
AFLA_019320	2.22e-15	1	2.22e-15	1
AFLA_019330	2.22e-15	1	2.22e-15	1
AFLA_019340	2.22e-15	1	2.22e-15	1
AFLA_019350	2.22e-15	1	2.22e-15	1
AFLA_019360	2.22e-15	1	2.22e-15	1
AFLA_019370	2.22e-15	1	2.22e-15	1
AFLA_019380	2.22e-15	1	2.22e-15	1
AFLA_019390	2.22e-15	1	2.22e-15	1
AFLA_019400	2.22e-15	1	2.22e-15	1
AFLA_019410	2.22e-15	1	2.22e-15	1
AFLA_019420	2.22e-15	1	2.22e-15	1
AFLA_019430	-2.77737	0.397605	-0.0895607	1
AFLA_019440	-1.11855	0.59706	-0.717813	1
AFLA_019450	2.22e-15	1	2.22e-15	1
AFLA_019460	2.22e-15	1	2.22e-15	1
AFLA_019470	0.263881	1	1.13683	1
AFLA_019480	2.22e-15	1	2.22e-15	1
AFLA_019490	0.332207	1	2.22e-15	1
AFLA_019500	1.92153	0.646661	2.12327	0.665768
AFLA_019510	-0.775102	1	0.100124	1
AFLA_019520	-1.85208	1	-3.29043	0.957155
AFLA_019530	-1.50598	0.553966	-1.10621	0.862169
AFLA_019540	-0.34115	1	-0.046672	1
AFLA_019550	2.22e-15	1	0.300989	1
AFLA_019560	2.22e-15	1	2.22e-15	1
AFLA_019570	2.19637	0.856738	1.09192	1
AFLA_019580	2.22e-15	1	2.22e-15	1
AFLA_019590	2.22e-15	1	0.676206	1
AFLA_019600	1.04831	1	-0.844258	1
AFLA_019610	2.22e-15	1	2.22e-15	1
AFLA_019620	2.22e-15	1	0.512724	1
AFLA_019630	-1.463	1	-1.463	1
AFLA_019640	2.22e-15	1	2.22e-15	1
AFLA_019650	0.158579	1	0.624948	1
AFLA_019660	-0.342668	1	0.00950149	1
AFLA_019670	-0.942387	1	0.290766	1
AFLA_019680	2.22e-15	1	2.22e-15	1
AFLA_019690	2.22e-15	1	0.9774	1
AFLA_019700	1.2929	0.763973	2.22e-15	1
AFLA_019710	2.22e-15	1	0.485013	1
AFLA_019720	-0.907491	1	-1.39028	0.961448
AFLA_019730	0.263881	1	1.7476	0.628984
AFLA_019740	1.51247	1	1.18903	1
AFLA_019750	1.2929	1	1.65361	1
AFLA_019760	-0.854359	1	1.1492	1
AFLA_019770	0.346572	1	-1.11849	0.320844
AFLA_019780	2.22e-15	1	2.22e-15	1
AFLA_019790	1.09367	1	0.360572	1
AFLA_019800	1.41595	0.347992	0.285029	1
AFLA_019810	1.05998	0.638554	-0.563476	1
AFLA_019820	0.205603	1	-1.72428	0.898239
AFLA_019830	0.395503	1	-1.56018	0.861048
AFLA_019840	-1.55297	0.626132	-1.72568	0.628984
AFLA_019850	-0.155324	1	-0.872934	1
AFLA_019860	0.508116	1	1.21206	1
AFLA_019870	0.247802	1	0.19061	1
AFLA_019880	0.263881	1	2.22e-15	1
AFLA_019890	0.0994709	1	-0.776037	1
AFLA_019900	0.608637	1	2.22e-15	1
AFLA_019910	2.22e-15	1	2.22e-15	1
AFLA_019920	0.263881	1	2.22e-15	1
AFLA_019930	2.22e-15	1	2.22e-15	1
AFLA_019940	2.22e-15	1	0.9774	1
AFLA_019950	2.22e-15	1	2.22e-15	1
AFLA_019960	2.22e-15	1	2.22e-15	1
AFLA_019970	0.332207	1	2.22e-15	1
AFLA_019980	0.263881	1	2.22e-15	1
AFLA_019990	-1.00633	1	0.686774	1
AFLA_020000	0.263881	1	2.22e-15	1
AFLA_020010	2.22e-15	1	2.22e-15	1
AFLA_020020	2.22e-15	1	2.22e-15	1
AFLA_020030	3.94267	0.16359	2.30752	0.491428
AFLA_020040	2.22e-15	1	1.10466	1
AFLA_020050	-1.74089	1	-0.954885	1
AFLA_020060	-1.9104	1	-1.11277	1
AFLA_020070	-2.03469	0.766454	-1.49306	1
AFLA_020080	-0.208368	1	-0.180017	1
AFLA_020090	2.66e-15	1	0.300989	1
AFLA_020100	2.22e-15	1	2.22e-15	1
AFLA_020110	0.986277	1	2.22e-15	1
AFLA_020120	2.22e-15	1	2.22e-15	1
AFLA_020130	0.734706	1	0.899698	1
AFLA_020140	0.0906825	1	-0.428317	1
AFLA_020150	2.66e-15	1	2.22e-15	1
AFLA_020160	1.12488	0.827107	1.24936	0.849046
AFLA_020170	-2.73415	0.79379	-1.43146	1
AFLA_020180	0.321247	1	0.2789	1
AFLA_020190	-1.52721	1	-2.13443	1
AFLA_020200	0.328581	1	-0.671992	1
AFLA_020210	2.22e-15	1	2.22e-15	1
AFLA_020220	0.263881	1	2.22e-15	1
AFLA_020230	0.456662	1	2.22e-15	1
AFLA_020240	0.332207	1	2.22e-15	1
AFLA_020250	2.22e-15	1	2.22e-15	1
AFLA_020260	0.456662	1	0.485013	1
AFLA_020270	2.78898	0.0112809	1.80396	0.040349
AFLA_020280	0.456662	1	0.642941	1
AFLA_020290	-4.79244	0.950163	-0.523739	1
AFLA_020300	2.25594	1	2.22e-15	1
AFLA_020310	1.34858	1	1.95364	1
AFLA_020320	2.22e-15	1	2.22e-15	1
AFLA_020330	1.64911	0.980335	0.512724	1
AFLA_020340	-0.846783	1	-1.59315	1
AFLA_020350	-0.401149	1	-0.382506	1
AFLA_020360	2.22e-15	1	2.22e-15	1
AFLA_020370	0.263881	1	2.22e-15	1
AFLA_020380	1.57884	1	0.840985	1
AFLA_020390	2.22e-15	1	2.66e-15	1
AFLA_020400	1.13374	1	2.22e-15	1
AFLA_020410	2.22e-15	1	2.22e-15	1
AFLA_020420	-0.66503	5.89e-05	-0.66503	5.81e-05
AFLA_020430	0.680473	1	0.685527	1
AFLA_020440	0.456662	1	2.88345	0.5817
AFLA_020450	1.90857	1	0.485013	1
AFLA_020460	2.22e-15	1	2.22e-15	1
AFLA_020470	0.608637	1	0.809397	1
AFLA_020480	2.22e-15	1	2.22e-15	1
AFLA_020490	0.916563	1	0.869787	1
AFLA_020500	1.06499	0.955361	1.5242	0.780554
AFLA_020510	-0.854613	0.711733	-1.11849	0.583584
AFLA_020520	-0.66503	1	0.471802	1
AFLA_020530	-0.66503	0.797216	-0.382506	1
AFLA_020540	0.332207	1	1.09192	1
AFLA_020550	-1.69551	1	-0.0538555	1
AFLA_020560	0.028854	1	-0.660232	1
AFLA_020570	2.22e-15	1	1.57424	0.834442
AFLA_020580	2.22e-15	1	0.300989	1
AFLA_020590	-2.17428	0.270837	-1.87329	0.388946
AFLA_020600	1.2929	1	3.22206	0.56536
AFLA_020610	-0.105191	1	0.304439	1
AFLA_020620	-0.699061	1	-0.39192	1
AFLA_020630	1.57191	0.84188	0.300989	1
AFLA_020640	0.734099	1	1.20503	1
AFLA_020650	0.263881	1	2.22e-15	1
AFLA_020660	-2.35027	6.51e-06	-2.35027	6.51e-06
AFLA_020670	0.608637	1	2.22e-15	1
AFLA_020680	0.206495	1	-0.260557	1
AFLA_020690	0.263881	1	2.22e-15	1
AFLA_020700	0.211472	1	-0.236451	1
AFLA_020710	-1.04108	1	-1.83916	1
AFLA_020720	0.5226	1	2.71701	0.998392
AFLA_020730	-1.0552	1	-1.01861	1
AFLA_020740	-0.866908	1	-0.820055	1
AFLA_020750	-2.12847	1	-1.68127	1
AFLA_020760	2.66e-15	1	2.22e-15	1
AFLA_020770	-0.694502	0.715113	-0.769279	0.734289
AFLA_020780	-1.77944	1	-2.23616	1
AFLA_020790	2.66e-15	1	0.642941	1
AFLA_020800	0.263881	1	2.22e-15	1
AFLA_020810	-0.208368	1	0.144367	1
AFLA_020820	0.992379	1	-0.267551	1
AFLA_020830	1.96868	1	0.848937	1
AFLA_020840	-1.97439	1	-0.792787	1
AFLA_020850	0.358287	1	1.47943	0.50255
AFLA_020860	1.35037	1	0.809397	1
AFLA_020870	2.47829	0.763559	0.921786	1
AFLA_020880	0.281242	1	-1.11849	0.832517
AFLA_020890	-0.651744	0.891154	-0.813556	0.834442
AFLA_020900	1.2929	1	0.88217	1
AFLA_020910	-0.634192	1	-0.90038	1
AFLA_020920	2.48648	1	1.75788	1
AFLA_020930	1.49277	0.9645	1.16122	1
AFLA_020940	-1.74089	0.122365	-0.945638	0.463553
AFLA_020950	-0.0563924	1	-0.66503	1
AFLA_020960	-0.661832	1	-1.11849	1
AFLA_020970	-0.0474488	1	-0.291759	1
AFLA_020980	0.441796	1	0.0423538	1
AFLA_020990	0.456662	1	2.22e-15	1
AFLA_021000	0.863628	1	-0.08728	1
AFLA_021010	-0.937233	1	-1.33724	1
[truncated: 10,138 more rows]
